# Supplementary material for: Quantitative Assessment of Grapevine Wood Colonization by the Dieback Fungus Eutypa lata
Source: MDPI journal article supplement (doi:10.3390/jof3020021), 2017-05-06
Supplement: s1 [file s1]

# ANALYSIS AND FIGURES FOR MANUSCRIPT

*Author: MOISY C.*

*08/03/2017*

## Contents

|          |                                             |           |
|----------|---------------------------------------------|-----------|
| <b>1</b> | <b>Preamble</b>                             | <b>2</b>  |
| 1.1      | R Markdown document . . . . .               | 2         |
| 1.2      | Working directory . . . . .                 | 2         |
| <b>2</b> | <b>Load data</b>                            | <b>3</b>  |
| 2.1      | Experiment 1 . . . . .                      | 3         |
| 2.2      | Experiment 2 . . . . .                      | 3         |
| 2.3      | Experiment 3 . . . . .                      | 4         |
| 2.4      | Experiment 4 . . . . .                      | 4         |
| <b>3</b> | <b>Load functions</b>                       | <b>5</b>  |
| 3.1      | For means, percentages and counts . . . . . | 5         |
| 3.2      | For standard errors . . . . .               | 6         |
| <b>4</b> | <b>Experiment 1</b>                         | <b>6</b>  |
| 4.1      | Figure S1 . . . . .                         | 6         |
| 4.2      | Figure 1 . . . . .                          | 7         |
| 4.2.1    | Select and format the data . . . . .        | 7         |
| 4.2.2    | Statistical (proportion) tests . . . . .    | 8         |
| 4.2.2.1  | for AM isolates . . . . .                   | 8         |
| 4.2.2.2  | for VL isolates . . . . .                   | 9         |
| 4.2.3    | Plot Figure 1 . . . . .                     | 11        |
| 4.3      | Figure 2 . . . . .                          | 12        |
| 4.3.1    | Means and percentages . . . . .             | 12        |
| 4.3.2    | Plot . . . . .                              | 13        |
| <b>5</b> | <b>Experiment 2</b>                         | <b>15</b> |
| 5.1      | Figure S2 . . . . .                         | 15        |
| 5.2      | Figure S3 . . . . .                         | 16        |
| 5.3      | Figure 3 . . . . .                          | 17        |
| 5.3.1    | Inoculation success percentages . . . . .   | 17        |
| 5.3.2    | Proportion tests . . . . .                  | 18        |
| 5.3.3    | Plot . . . . .                              | 19        |
| 5.4      | Figure 4 . . . . .                          | 21        |
| <b>6</b> | <b>Experiment 3</b>                         | <b>23</b> |
| 6.1      | Figure 5 . . . . .                          | 23        |
| 6.2      | Figure S4 . . . . .                         | 25        |
| 6.3      | Analysis (figure 5) . . . . .               | 27        |
| 6.3.1    | Set up dataframe . . . . .                  | 27        |
| 6.3.2    | Explore data (interaction plot) . . . . .   | 28        |
| 6.3.3    | Linear model fit . . . . .                  | 28        |
| 6.3.4    | Diagnostics via residuals . . . . .         | 28        |
| 6.3.5    | Anova . . . . .                             | 29        |

|                                                 |           |
|-------------------------------------------------|-----------|
| <b>7 Experiment 4</b>                           | <b>30</b> |
| 7.1 Figure 6 . . . . .                          | 30        |
| 7.2 Analysis (figure 6) . . . . .               | 31        |
| 7.2.1 Set up dataframe . . . . .                | 31        |
| 7.2.2 Explore data (interaction plot) . . . . . | 32        |
| 7.2.3 Linear model fit . . . . .                | 32        |
| 7.2.4 Diagnostics via residuals . . . . .       | 32        |
| 7.2.5 Anova . . . . .                           | 33        |

**This document is a supplementary data from the manuscript “Quantitative assessment of grapevine wood colonization by the dieback fungus *Eutypa lata*” submitted to Journal of Fungi in 2017.**

Cédric Moisy (1), Gilles Berger (2), Timothée Flutre (2), Loïc Le Cunff (1) and Jean-Pierre Péros (2)

(1) Institut Français de la Vigne et du Vin, UMT Géno-Vigne, F-34060 Montpellier, France

(2) INRA, UMR AGAP, F-34060 Montpellier, France

License: none

### IMPORTANT NOTE:

In order to run this code on your own computer:

- 1- create a folder somewhere,
- 2- copy the “Rmd” file in this folder,
- 3- copy all the data files in the same folder,
- 4- specify the correct path to this folder in the “working directory” section below,
- 5- knit the “Rmd” file to convert it into HTML (you may have to install external packages as indicated below).

## 1 Preamble

### 1.1 R Markdown document

This is an R Markdown document. Markdown is a simple formatting syntax for authoring HTML, PDF, and MS Word documents. For more details on using R Markdown see <http://rmarkdown.rstudio.com>. When you click the **Knit** button a document will be generated that includes both content as well as the output of any embedded R code chunks within the document.

### 1.2 Working directory

In order to convert the Rmd file into HTML and PDF while reproducing the whole analysis, we need to specify the path to the directory containing all necessary files.

```
##### YOU NEED TO SPECIFY THIS PATH #####
# data.dir <- "PATH" <<<<<< ! ! !
#####
stopifnot(file.exists(data.dir))
```

You also need external packages:

Note that “The Bayesian First Aid” package requires a working installation of JAGS.

Bååth, R., (2014) Bayesian First Aid: A Package that Implements Bayesian Alternatives to the Classical \*.test Functions in R. In the proceedings of UseR! 2014 - the International R User Conference (pdf). To install the package from github you also need the devtools package.

## 2 Load data

### 2.1 Experiment 1

Wood colonization in relation to aggressiveness and distance from inoculation site

```
d1 <- "EL_wood_compare_4_isolates.txt"
data1 <- read.table(file=paste0(data.dir, "/", d1), skip=4, header=TRUE, sep="\t", quote="")
head(data1)
```

```
##   n  date dpi   treat          var rep dist_cm EL
## 1 1 01/08  15 VL_11-12 Cabernet-Sauvignon 1      0 0
## 2 2 01/08  15 VL_11-12 Cabernet-Sauvignon 2      0 1
## 3 3 01/08  15 VL_11-12 Cabernet-Sauvignon 3      0 1
## 4 4 01/08  15 VL_11-12 Cabernet-Sauvignon 4      0 C
## 5 5 01/08  15 VL_11-12 Cabernet-Sauvignon 5      0 0
## 6 6 01/08  15 VL_11-12 Cabernet-Sauvignon 6      0 1
```

```
summary(data1)
```

```
##           n           date           dpi           treat
## Min.      : 1    01/08:360   Min.      :15.0   AM_78-1 :360
## 1st Qu.: 361   10/08:360   1st Qu.:26.2   AM_78-4 :360
## Median : 720   12/09:360   Median :37.5   VL_11-12:360
## Mean     : 720   24/08:360   Mean    :37.5   VL_11-3 :360
## 3rd Qu.:1080           3rd Qu.:48.8
## Max.     :1440           Max.     :60.0
##           var           rep           dist_cm           EL
## Cabernet-Sauvignon:1440   Min.      : 1.0   Min.      :0    0    :599
##                           1st Qu.: 8.0   1st Qu.:0    1    :434
##                           Median :15.5   Median :1    C    :404
##                           Mean     :15.5   Mean     :1   NA's: 3
##                           3rd Qu.:23.0   3rd Qu.:2
##                           Max.      :30.0   Max.      :2
```

### 2.2 Experiment 2

Comparison of grapevine cultivars for their tolerance wood colonization by *E. lata*.

```
d2 <- "EL_wood_compare_5_cultivars_Vv.txt"
data2 <- read.table(file=paste0(data.dir, "/", d2), skip=4, header=TRUE, sep="\t", quote="")
head(data2)
```

```
##   n  date dpi treat   var rep dist_cm EL
## 1 1 08-août 15   T- Aramon 1      0  C
## 2 2 08-août 15   T- Aramon 2      0  0
## 3 3 08-août 15   T- Aramon 3      0  0
## 4 4 08-août 15   T- Aramon 4      0  0
## 5 5 08-août 15   T- Aramon 5      0  C
## 6 6 08-août 15   T- Aramon 1      1  0
```

```
summary(data2)
```

```
##           n           date           dpi           treat
## Min.      : 1    05-sept:375   Min.      :15.0   T-      : 300
## 1st Qu.: 376    08-août:375   1st Qu.:26.2   VL_11-12:1200
```

```
## Median : 750    19-sept:375    Median :37.5
## Mean   : 750    22-août:375    Mean   :37.5
## 3rd Qu.:1125                    3rd Qu.:48.8
## Max.   :1500                    Max.   :60.0
##
##          var          rep          dist_cm          EL
## Aramon      :300    Min.   : 1    Min.   :0    0    :831
## Cabernet-Sauvignon:300    1st Qu.: 4    1st Qu.:0    1    :263
## Carignan     :300    Median : 8    Median :1    C    :395
## Chasselas    :300    Mean   : 9    Mean   :1    NA's: 11
## Grenache     :300    3rd Qu.:14    3rd Qu.:2
##
##          Max.   :20    Max.   :2
```

## 2.3 Experiment 3

qPCR as a tool to evaluate wood colonization by *E. lata*.

```
dpi <- "EL_qPCR_different_points.txt"
dpi.df<- read.table(file=paste0(data.dir, "/", dpi), header=TRUE, skip=2, sep="\t")
head(dpi.df)
```

```
##   n          sample treat   PCR dist_cm dpi rep nb_copies
## 1 1 EL_2sem_1cm-_1    EL actin    1-  15  1    18648
## 2 2 EL_2sem_1cm-_2    EL actin    1-  15  2         NA
## 3 3 EL_2sem_1cm-_3    EL actin    1-  15  3    31694
## 4 4 EL_2sem_1cm-_4    EL actin    1-  15  4     7695
## 5 5 EL_4sem_1cm-_1    EL actin    1-  30  1    29207
## 6 6 EL_4sem_1cm-_2    EL actin    1-  30  2    33408
```

```
summary(dpi.df)
```

```
##           n          sample      treat      PCR      dist_cm
## Min.      : 1.0    T-_8sem_1cm+_3: 3    EL :64    actin:68    1- :64
## 1st Qu.: 34.8    EL_2sem_1cm-_1: 2    H2O: 8     EL  :68    1+ :64
## Median : 68.5    EL_2sem_1cm-_2: 2    T- :64                    NA's: 8
## Mean      : 68.5    EL_2sem_1cm-_3: 2
## 3rd Qu.:102.2    EL_2sem_1cm-_4: 2
## Max.      :136.0    EL_2sem_1cm+_1: 2
##
##          (Other)      :123
##          dpi          rep          nb_copies
## Min.      :15.0    Min.      :1.00    Min.      : 0
## 1st Qu.:15.0    1st Qu.:2.00    1st Qu.: 18
## Median :30.0    Median :3.00    Median : 3113
## Mean      :36.2    Mean      :2.52    Mean      :11437
## 3rd Qu.:45.0    3rd Qu.:4.00    3rd Qu.:22134
## Max.      :60.0    Max.      :4.00    Max.      :40199
##
##          NA's      :20
```

## 2.4 Experiment 4

Comparison of *E. lata* aggressiveness by qPCR.

```
data.agr <- paste0(data.dir, "/data_AGR.csv")
d.agr <- read.table(file=data.agr, header=TRUE, sep=";")
head(d.agr)
```

```
##      sample Treatment Rep btub_Elata   sd      agr_level stroma
## 1         1     AM 78.1   1      18533  605 high-aggressive   AM
## 2         2     AM 78.1   2      47926  727 high-aggressive   AM
## 3         3     AM 78.1   3      20755 1519 high-aggressive   AM
## 4         4     AM 78.4   1        9323  199 low-aggressive    AM
## 5         5     AM 78.4   2      12379 1498 low-aggressive    AM
## 6         6     AM 78.4   3      16267  384 low-aggressive    AM
```

```
summary(d.agr)
```

```
##      sample      Treatment      Rep      btub_Elata      sd
## Min.   : 1     AM 78.1 :3   Min.   :1   Min.   :    7   Min.   :    0
## 1st Qu.: 6     AM 78.4 :3   1st Qu.:1   1st Qu.: 5311   1st Qu.: 244
## Median :11    BX 1.10 :3   Median :2   Median :13435   Median : 456
## Mean   :11    BX 1.5   :3   Mean    :2   Mean   :13828   Mean   : 630
## 3rd Qu.:16    CM 96.07:3   3rd Qu.:3   3rd Qu.:18533   3rd Qu.: 848
## Max.   :21    CM 96.6 :3   Max.    :3   Max.   :47926   Max.   :1882
##           Control :3
##           agr_level stroma
## high-aggressive:9   AM   :6
## low-aggressive :9   BX   :6
## NA's           :3   CM   :6
##               NA's:3
##
##
##
```

### 3 Load functions

#### 3.1 For means, percentages and counts

```
# Function to calculate the mean and the standard deviation and percentage (NA removed)
# for each group
# data : a data frame
# varname : the name of a column containing the variable to be summarized
# groupnames : vector of column names to be used as grouping variables

data_summary <- function(data, varname, groupnames){
  require(plyr)
  summary_func <- function(x, col){
    c(mean = mean(x[[col]], na.rm=TRUE),
      sd = sd(x[[col]], na.rm=TRUE),
      numb = sum(x[[col]], na.rm=TRUE),
      perc = round(sum(x[[col]], na.rm=TRUE)
                    /length(na.omit(x[[col]]))*100,
                    digits = 0),
      count.no.NA = length(na.omit(x[[col]]))
    )
  }
  data_sum <- ddply(data, groupnames, .fun=summary_func, varname)
  #data_sum <- rename(data_sum, c("mean" = varname))
  return(data_sum)
}
```

## 3.2 For standard errors

```
# Function to calculate the standard error from dataframe x
std.error <- function(x, na.rm = T) {
  sqrt(var(x, na.rm = na.rm)/length(x[complete.cases(x)]))
}
```

# 4 Experiment 1

Comparison of four isolates of *E. lata* for their ability to colonize the wood of grapevine

## 4.1 Figure S1

```
# load data
df<- data1

# update labelling in the dataframe
levels(df$EL)<- c("UNCONTAMINATED","EL","CONTAMINATED")
df$EL <- factor(df$EL, levels = c("EL","UNCONTAMINATED","CONTAMINATED"))

# barplot
p <- ggplot(data=na.omit(df), aes(dist_cm, fill=as.factor(EL))) + geom_bar()
p <- p + stat_count(aes(label = ..count..), geom="text", color="black", vjust=1.1)
p <- p + xlab("Distance (cm) from inoculation site")
p <- p + ylab("Number of observations")
p <- p + scale_fill_manual(values=c("#66CC99", "grey90", "#FF67A4"))
p <- p + facet_grid(dpi ~ treat)
p <- p + theme_bw() + theme(legend.position="bottom")
print(p)
```

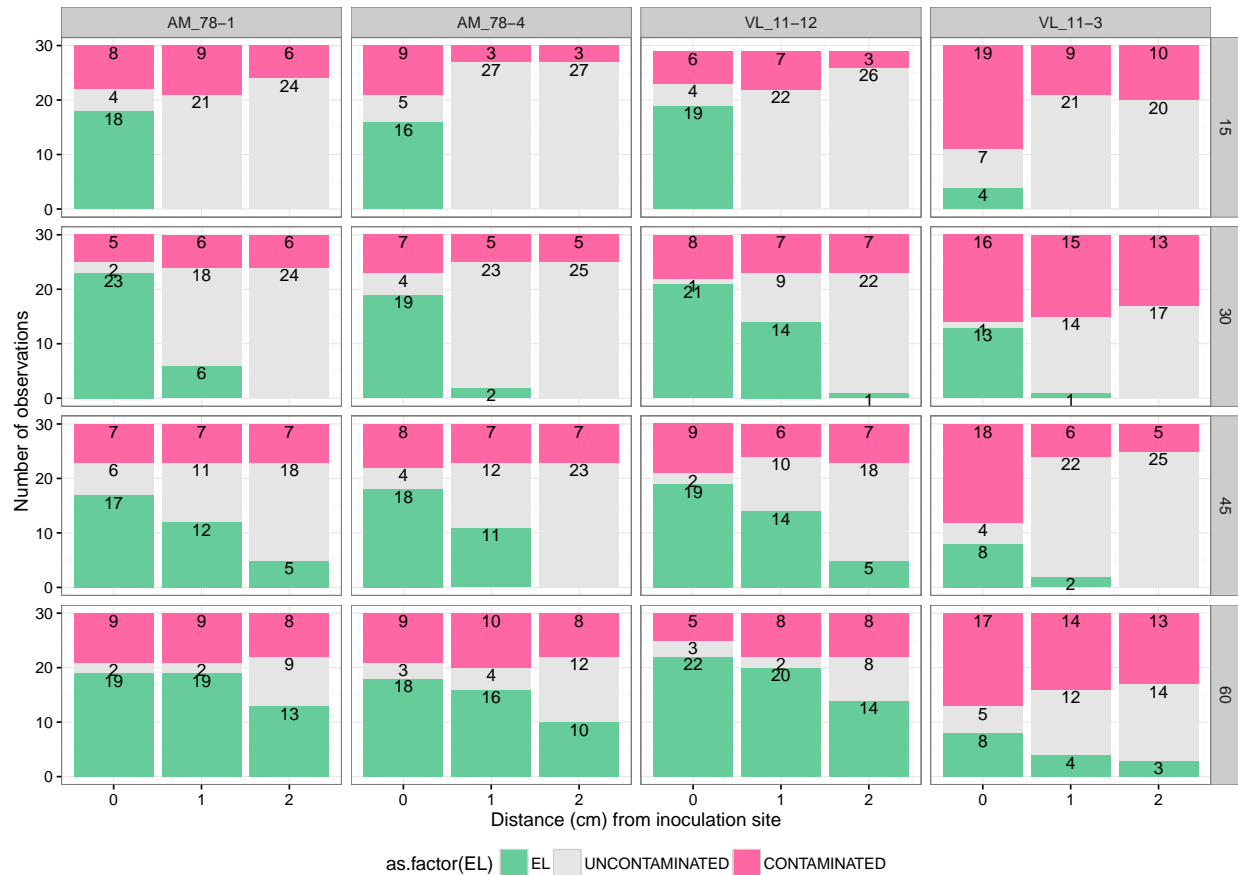

## 4.2 Figure 1

Comparison of four *E. lata* isolates for their inoculation efficiency

### 4.2.1 Select and format the data

```
# remove controls (T-)
d1.noT <- subset(data1, treat!="T-")

# replace contaminated sample by NA
d1.noT$EL[d1.noT$EL == "C"] <- NA

# formatting
d1.noT$EL <- as.numeric(as.character(d1.noT$EL)) # as numeric (0/1/NA)

# calculate means and the std.err and percentage
d1.noT_sum <- data_summary(data= d1.noT, varname= "EL", groupnames=c("treat"))

# keep only values at 0 cm to estimate the inoculation success
d1.noT.0 <- subset(d1.noT, dist_cm == "0")

# calculate means and the std.err and percentage
```

```

d1.noT.O_sum <- data_summary(data= d1.noT.O, varname= "EL", groupnames=c("treat"))

d1.noT.O_sum$treat.count <- paste0(d1.noT.O_sum$treat, "\n(n= ",
                                   d1.noT.O_sum$count.no.NA,")")

# add column with isolate name
d1.noT.O_sum$fam <- substr(d1.noT.O_sum$treat, 1, 2)

```

## 4.2.2 Statistical (proportion) tests

### 4.2.2.1 for AM isolates

Analysis of proportions with `prop.test()` and `bayes.prop.test()`

```

# select isolates
d <- subset(d1.noT.O_sum, fam=="AM")

# test proportions with prop.test()
res.AM.1 <- prop.test(d$numb, d$count.no.NA)
res.AM.1

##
## 2-sample test for equality of proportions with continuity
## correction
##
## data: d$numb out of d$count.no.NA
## X-squared = 0.1, df = 1, p-value = 0.7
## alternative hypothesis: two.sided
## 95 percent confidence interval:
## -0.0913 0.1514
## sample estimates:
## prop 1 prop 2
## 0.846 0.816

# test proportions with bayes.prop.test()
res.AM.2 <- BayesianFirstAid::bayes.prop.test(d$numb, d$count.no.NA)
# print results
res.AM.2

```

```

##
## Bayesian First Aid proportion test
##
## data: d$numb out of d$count.no.NA
## number of successes: 77, 71
## number of trials: 91, 87
## Estimated relative frequency of success [95% credible interval]:
## Group 1: 0.84 [0.76, 0.91]
## Group 2: 0.81 [0.73, 0.89]
## Estimated group difference (Group 1 - Group 2):
## 0.03 [-0.08, 0.14]
## The relative frequency of success is larger for Group 1 by a probability
## of 0.704 and larger for Group 2 by a probability of 0.296 .

# plot intervals
plot(res.AM.2)

```



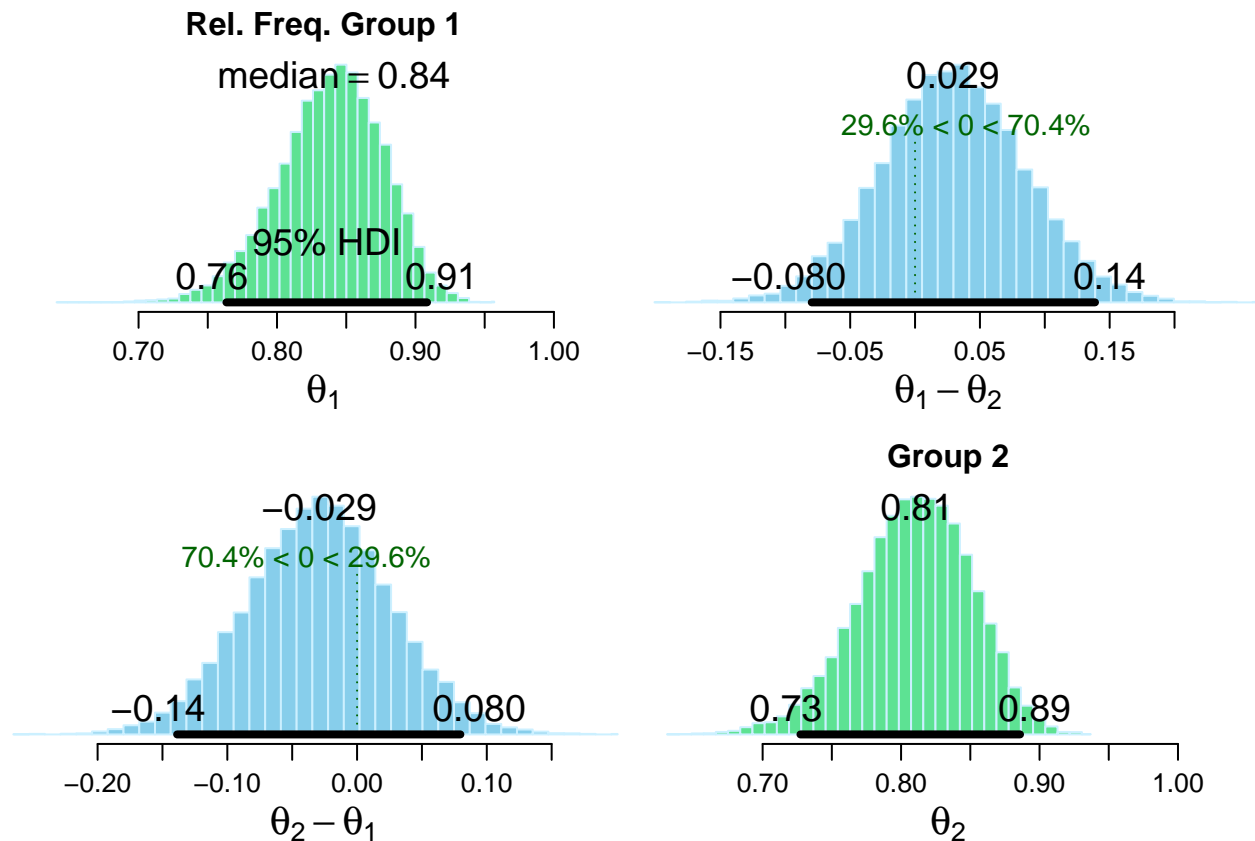

Note that:

**Group 1** = AM\_78-1

**Group 2** = AM\_78-4

The estimated relative frequency of inoculation success was not significantly different between isolates AM78-4 and AM78-1.

#### 4.2.2.2 for VL isolates

Analysis of proportions with `prop.test()` and `bayes.prop.test()`

```
# select isolates
d <- subset(d1.noT.0_sum, fam=="VL")

# test proportions with prop.test()
res.VL.1 <- prop.test(d$numb, d$count.no.NA)
res.VL.1
```

```
##
## 2-sample test for equality of proportions with continuity
## correction
##
## data: d$numb out of d$count.no.NA
## X-squared = 10, df = 1, p-value = 0.002
## alternative hypothesis: two.sided
## 95 percent confidence interval:
## 0.0684 0.3918
## sample estimates:
```

```
## prop 1 prop 2
## 0.89 0.66

# test proportions with bayes.prop.test()
res.VL.2 <- BayesianFirstAid::bayes.prop.test(d$numb, d$count.no.NA)
# print results
res.VL.2

##
## Bayesian First Aid proportion test
##
## data: d$numb out of d$count.no.NA
## number of successes: 81, 33
## number of trials: 91, 50
## Estimated relative frequency of success [95% credible interval]:
## Group 1: 0.88 [0.82, 0.94]
## Group 2: 0.66 [0.53, 0.79]
## Estimated group difference (Group 1 - Group 2):
## 0.23 [0.085, 0.37]
## The relative frequency of success is larger for Group 1 by a probability
## of >0.999 and larger for Group 2 by a probability of <0.001 .

# plot intervals
plot(res.VL.2)
```

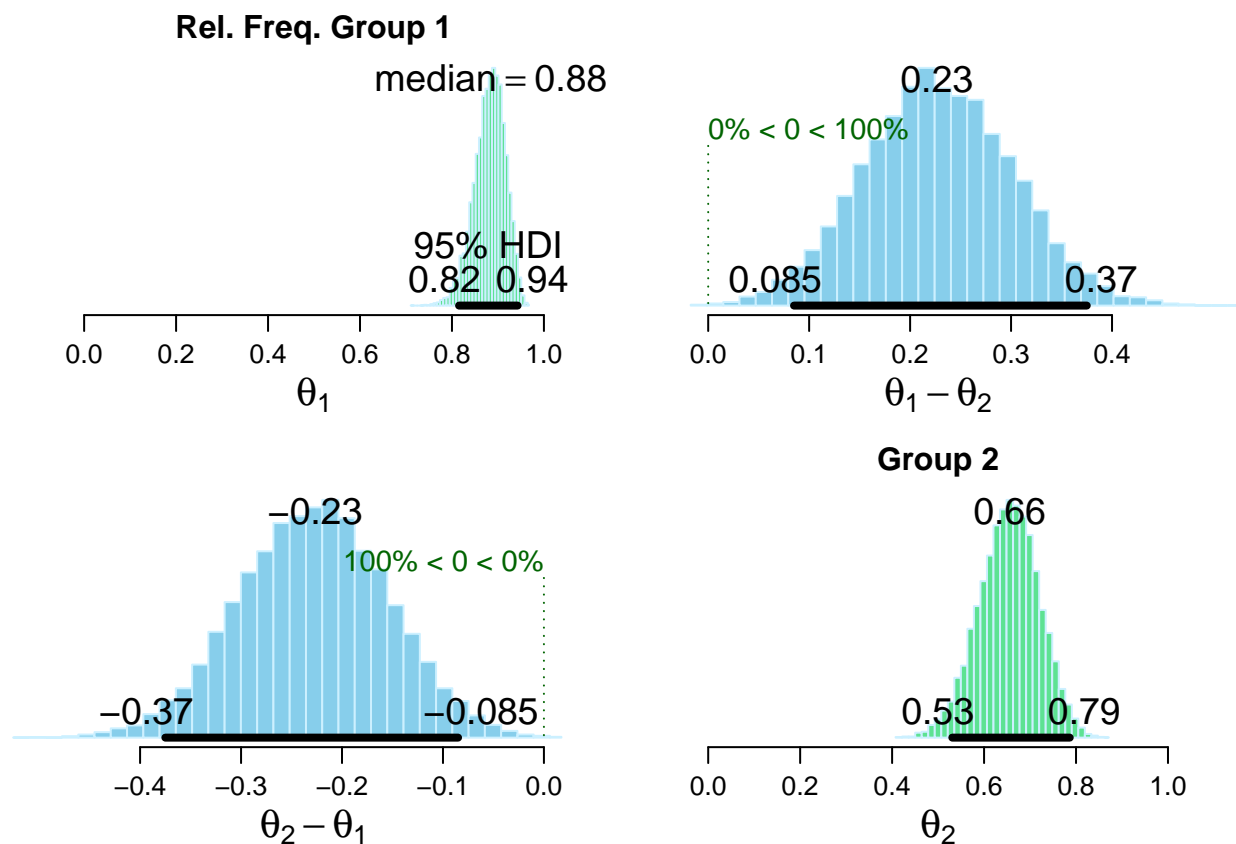

Note that:

Group 1 = VL\_11-12

Group 2 = VL\_11-3

The estimated relative frequency of inoculation success was significantly different between isolates VL11-3 and VL11-12 by a probability of 99.9 %.

### 4.2.3 Plot Figure 1

```
# estimate credible intervals
result.test.1 <- BayesianFirstAid::bayes.prop.test(d1.noT.0_sum$numb,
                                                  d1.noT.0_sum$count.no.NA)

# The object "result.test.1$stats" contains the 95-percent-credible intervals
# in the "HDIlo" & "HDIup" in columns ([1:5,5:6]).
# We need to retrieve them to set up the std error bars in the next plot
res <- as.data.frame(result.test.1$stats)
lim.down <- res[1:4,5]
lim.up <- res[1:4,6]

# Define the top and bottom of the errorbars
limits <- aes(ymax= lim.up *100,
              ymin= lim.down *100)

# set colors
my_col=c("brown", "palegreen", "brown", "palegreen")

# barplot and std.error
p <- ggplot(d1.noT.0_sum, aes(as.factor(treat.count), perc, fill=treat))
p <- p + geom_bar(stat="identity", position="dodge", color="black")
p <- p + geom_errorbar(limits, position=position_dodge(.9), width=.2)
p <- p + geom_text(aes(label=paste0(round(perc,0), "%"),
                      position=position_dodge(width=0.9), vjust=-.5)

p <- p + scale_fill_manual(values= my_col)
p <- p + ylim(0, 100)
p <- p + labs(title= "Figure 1",
              x= "EL isolates",
              y= "Inoculation efficiency (%)")
p <- p + facet_grid(. ~ fam, scales = "free")
p <- p + theme_bw() + theme(legend.position="bottom")
print(p)
```

Figure 1

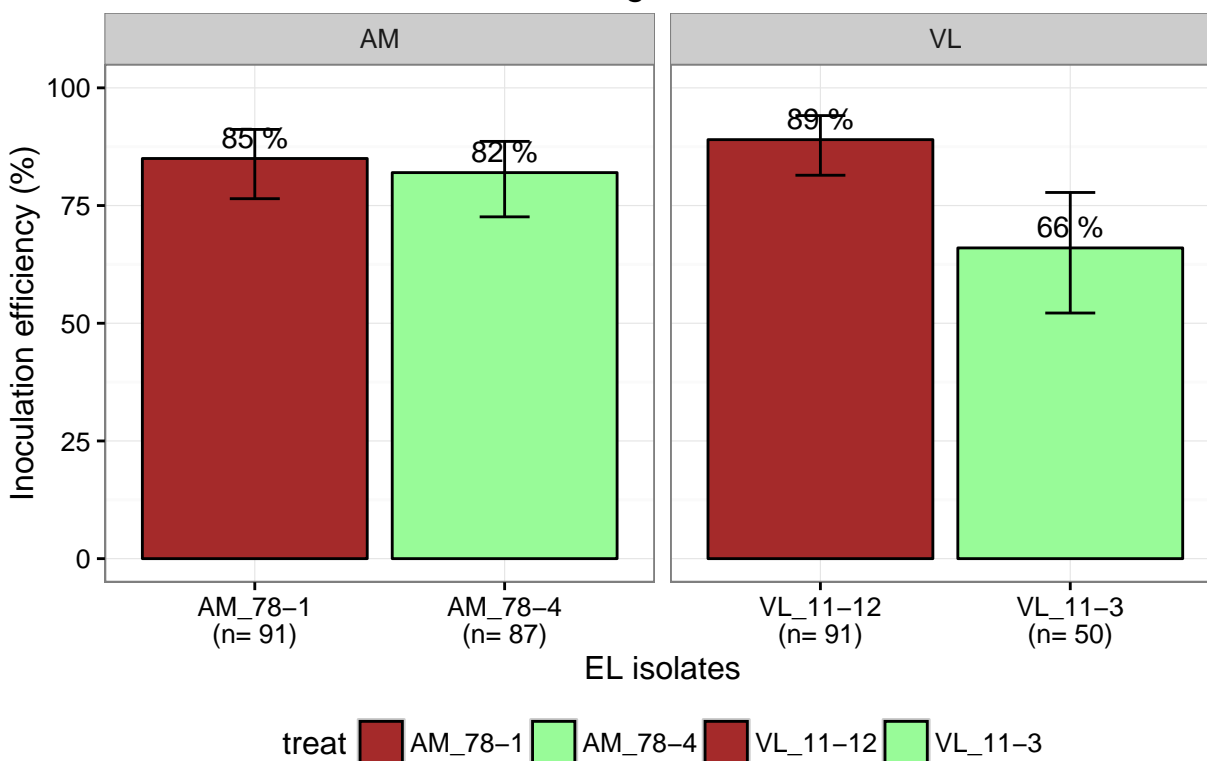

95% credible intervals were calculated for each cultivar using Bayesian proportion test and represented as error bars in the figure.

### 4.3 Figure 2

Percentage of wood samples colonized by four *E. lata* isolates

#### 4.3.1 Means and percentages

Calculate the means, percentages and counts

```
# Replace contaminated sample "C" by "NA" in the dataframe
data1$EL[data1$EL == "C"] <- NA

# formatting
data1$EL <- as.numeric(as.character(data1$EL)) # as numeric (0/1/NA)
data1$dpi <- as.factor(as.character(data1$dpi)) # as numeric (15/30/45/60)
data1$dist_cm <- as.factor(as.character(data1$dist_cm)) # as numeric (0/1/2)

# means, percentages and counts
data1_sum <- data_summary(data= data1, varname= "EL",
                          groupnames=c("dpi", "treat", "var", "dist_cm"))

# update column names
colnames(data1_sum)[5] <- "EL.mean"
colnames(data1_sum)[6] <- "EL.mean.sd"
colnames(data1_sum)[8] <- "EL.perc"
```

```
head(data1_sum)
```

```
##   dpi   treat          var dist_cm EL.mean EL.mean.sd numb EL.perc
## 1  15 AM_78-1 Cabernet-Sauvignon      0  0.818      0.395   18     82
## 2  15 AM_78-1 Cabernet-Sauvignon      1  0.000      0.000    0      0
## 3  15 AM_78-1 Cabernet-Sauvignon      2  0.000      0.000    0      0
## 4  15 AM_78-4 Cabernet-Sauvignon      0  0.762      0.436   16     76
## 5  15 AM_78-4 Cabernet-Sauvignon      1  0.000      0.000    0      0
## 6  15 AM_78-4 Cabernet-Sauvignon      2  0.000      0.000    0      0
##   count.no.NA
## 1           22
## 2           21
## 3           24
## 4           21
## 5           27
## 6           27
```

```
str(data1_sum)
```

```
## 'data.frame':   48 obs. of  9 variables:
## $ dpi          : Factor w/ 4 levels "15","30","45",...: 1 1 1 1 1 1 1 1 1 1 ...
## $ treat        : Factor w/ 4 levels "AM_78-1","AM_78-4",...: 1 1 1 2 2 2 3 3 3 4 ...
## $ var          : Factor w/ 1 level "Cabernet-Sauvignon": 1 1 1 1 1 1 1 1 1 1 ...
## $ dist_cm      : Factor w/ 3 levels "0","1","2": 1 2 3 1 2 3 1 2 3 1 ...
## $ EL.mean      : num  0.818 0 0 0.762 0 ...
## $ EL.mean.sd   : num  0.395 0 0 0.436 0 ...
## $ numb         : num  18 0 0 16 0 0 19 0 0 4 ...
## $ EL.perc      : num  82 0 0 76 0 0 83 0 0 36 ...
## $ count.no.NA : num  22 21 24 21 27 27 23 22 26 11 ...
```

## 4.3.2 Plot

Plot Figure 2: Percentage of wood samples colonized by four *E. lata* isolates

```
# add label
data1_sum$mylabel <- paste0(data1_sum$EL.perc, "%(n=", data1_sum$count.no.NA, ")")

### FUNCTION to compare EL aggressivene ss,

ggplot.comp.aggr.by.dist <- function(d, distance, main){
  # d= dataframe with "dpi", "EL.perc", "dist_cm" columns
  # fungus= name of the fungus considered, needed to subset data

  # subset data for the variety
  d <- subset(d, d$dist_cm==distance)

  # ggplot
  p <- ggplot(d, aes(x=dpi, y=EL.perc, group=treat))
  p <- p + geom_line(aes(linetype=treat, color=treat, size=treat))
  p <- p + geom_point(aes(shape=treat, size=3))
  p <- p + scale_linetype_manual(values=c("dashed", "dashed", "solid", "solid"))
  p <- p + scale_color_manual(values= c("red", "green", "brown", "green"))
  p <- p + scale_size_manual(values=c(1,1,1,1))
  p <- p + labs(title = paste0("at ", distance, " cm from IP"))
```

```

p <- p + ylim(c(0, 100))
p <- p + theme_bw() + theme(legend.position="bottom")
print(p)
}

# remove distance "0 cm" before plotting
d <- subset(data1_sum, dist_cm!="0")

# plotting
p1 <- ggplot.comp.aggr.by.dist(d, distance=1, main=my_title)

```

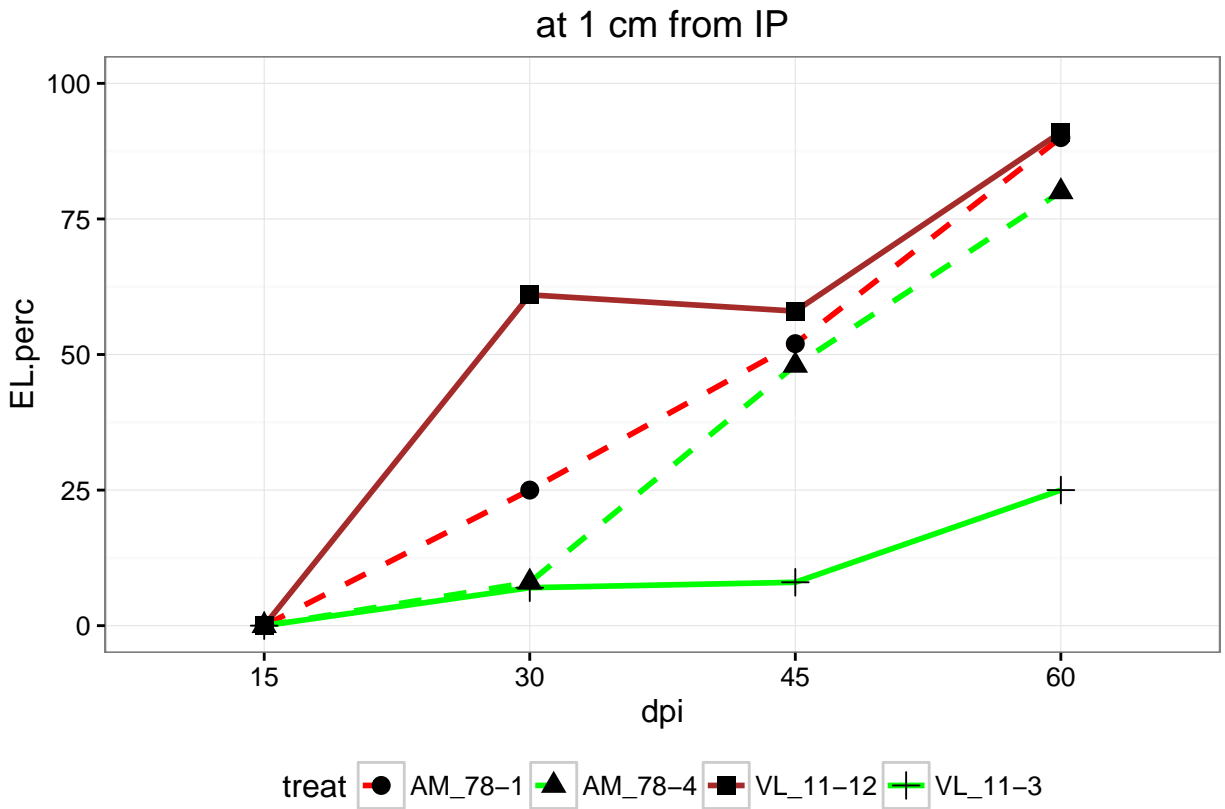

```

p2 <- ggplot.comp.aggr.by.dist(d, distance=2, main=my_title)

```

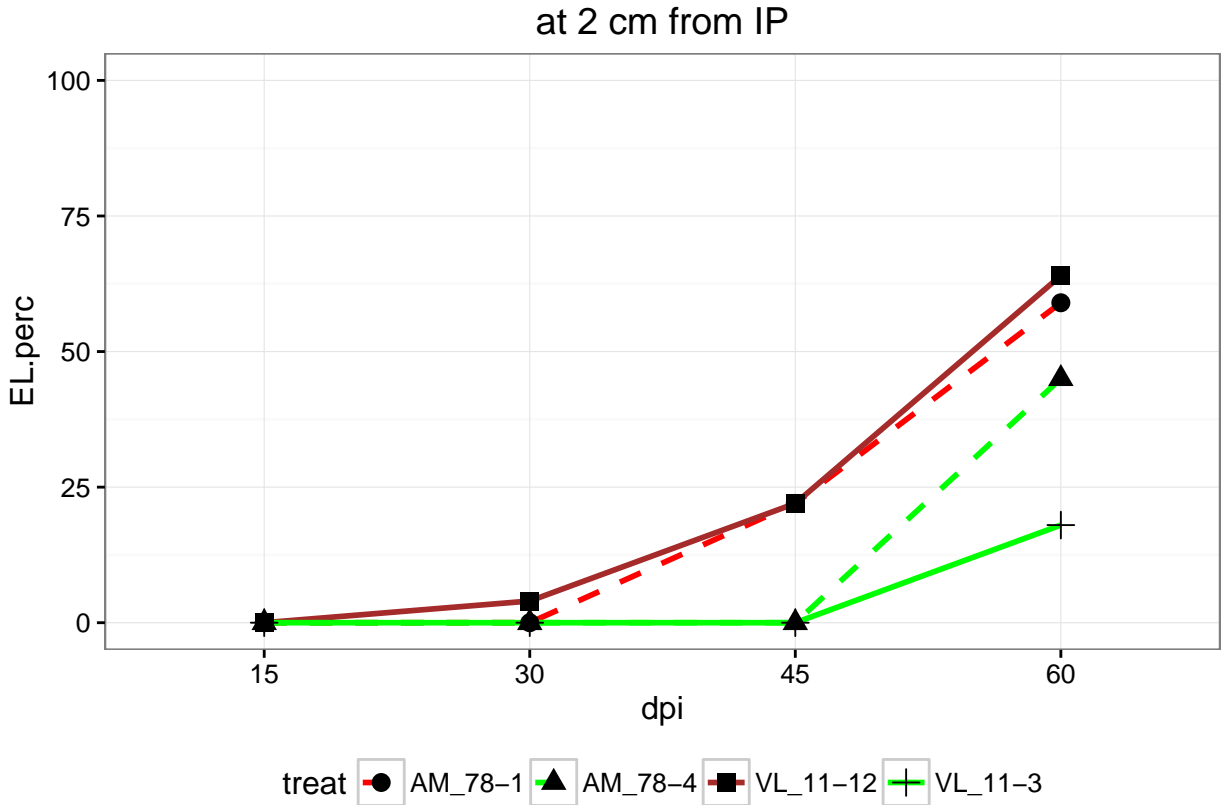

## 5 Experiment 2

Comparison of five grapevine varieties for their tolerance to *E. lata* colonization

### 5.1 Figure S2

Contaminations observed in wood chips sampled in control plants.

```
# load data
df<- data2

# replace "C" by "conta" and != "C" by "uncontam." in df
levels(df$EL)<- c("UNCONTAMINATED","EL","CONTAMINATED")
df$EL <- factor(df$EL, levels = c("EL","UNCONTAMINATED","CONTAMINATED"))

# select data from controls
tmp <- subset(na.omit(df),treat=="T-")
levels(tmp$treat)[1]<- "CONTROLS"

# plot results
p <- ggplot(data=tmp, aes(dist_cm, fill=as.factor(EL))) + geom_bar()
p <- p + stat_count(aes(label = ..count..), geom="text", color="black", vjust=1.1)
p <- p + xlab("Distance from inoculation site")+ ylab("Number of observations")
p <- p + scale_fill_manual(values=c("grey90","#FF67A4"))
```

```
p <- p + facet_grid(dpi ~ var)+ scale_x_discrete(limits=0:2)
p <- p + theme_bw() + theme(legend.position="bottom")
print(p)
```

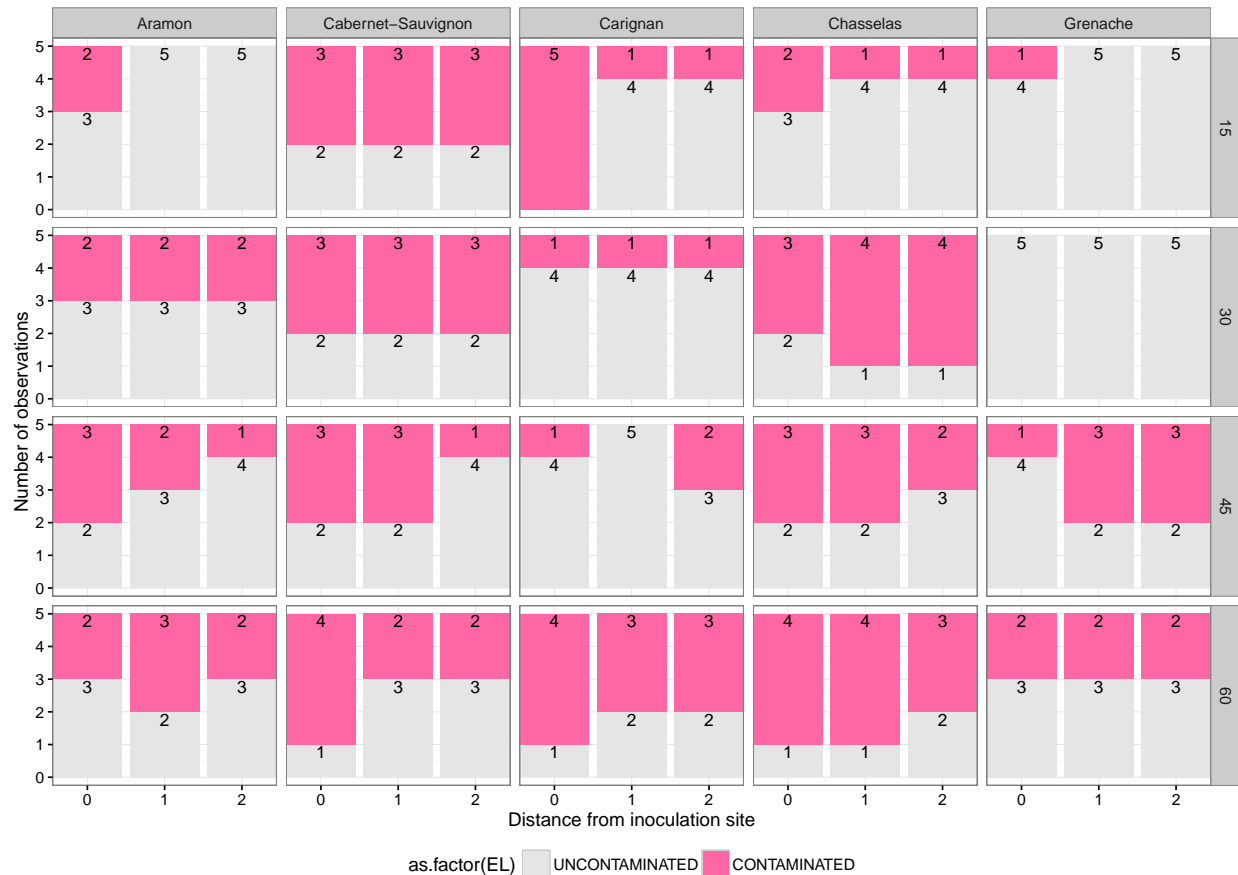

## 5.2 Figure S3

Comparison of grapevine cultivars for their tolerance to wood colonization by *E. lata* and other microorganisms.

```
# remove controls
tmp <- subset(na.omit(df), treat!="T-")

# plot results
p <- ggplot(data=tmp, aes(dist_cm, fill=as.factor(EL))) + geom_bar()
p <- p + stat_count(aes(label = ..count..), geom="text", color="black", vjust=1.1)
p <- p + xlab("Distance from inoculation site")+ ylab("Number of observations")
p <- p + scale_fill_manual(values=c("#66CC99", "grey90", "#FF67A4"))
p <- p + facet_grid(dpi ~ var)+ scale_x_discrete(limits=0:2)
p <- p + theme_bw() + theme(legend.position="bottom")
print(p)
```



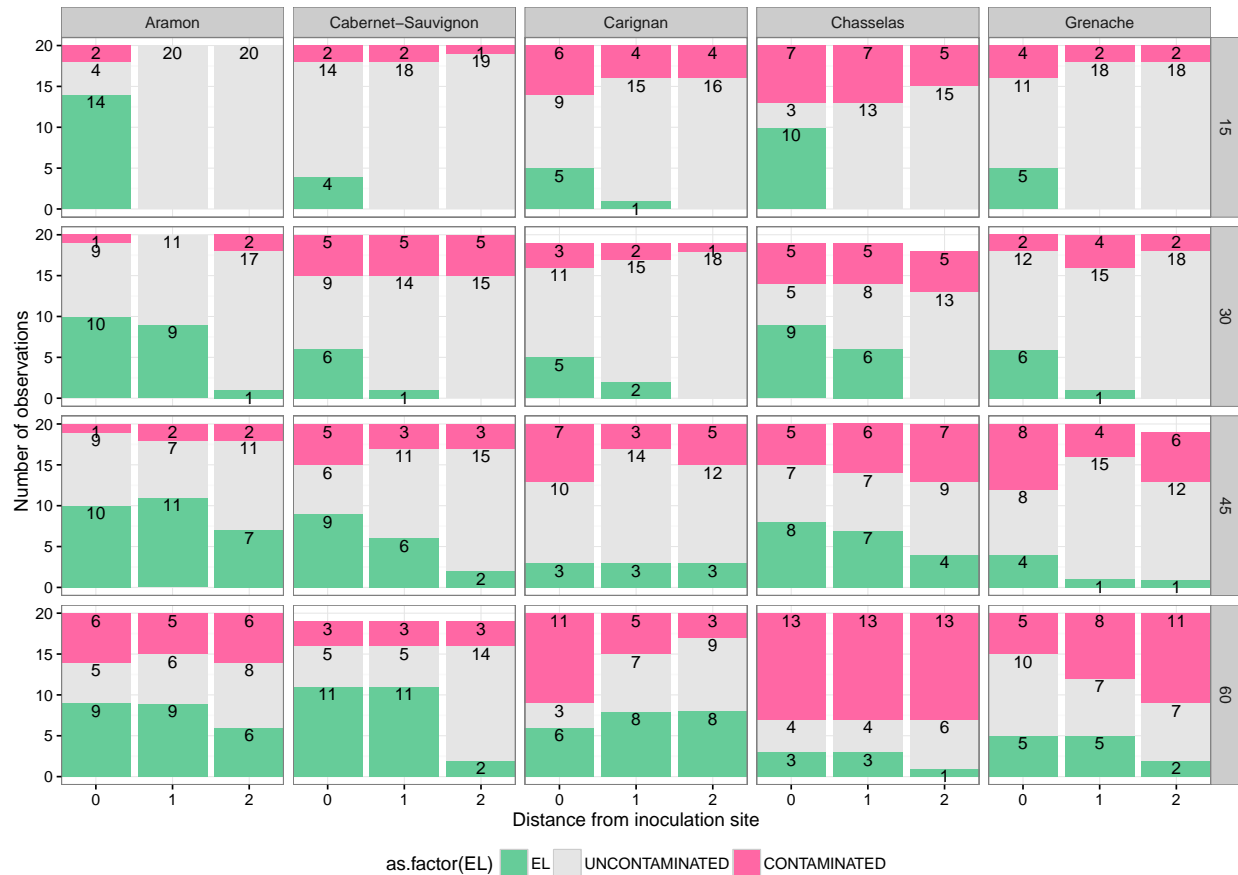

### 5.3 Figure 3

Comparison of cultivars and proportion tests

#### 5.3.1 Inoculation success percentages

```
# remove controls
d.noT <- subset(data2, treat!="T-")

# replace contaminated sample by NA
d.noT$EL[d.noT$EL == "C"] <- NA

# formatting
d.noT$EL <- as.numeric(as.character(d.noT$EL)) # as numeric (0/1/NA)

# keep only values at 0 cm to illustrate the infection of the cutting
d.noT.0 <- subset(d.noT, dist_cm=="0")

# calculate means and the std.err and percentage
d.noT.0_sum <- data_summary(data= d.noT.0, varname= "EL",
                             groupnames=c("var")) # , "dist_cm", "dpi", "treat",
```

### 5.3.2 Proportion tests

Test for equality of proportions with `prop.test()` and `bayes.prop.test()` functions.

```
# check order of cultivars
d.noT.O_sum$var

## [1] Aramon          Cabernet-Sauvignon Carignan
## [4] Chasselas        Grenache
## Levels: Aramon Cabernet-Sauvignon Carignan Chasselas Grenache

# run test
result.test.1 <- prop.test(d.noT.O_sum$numb, d.noT.O_sum$count.no.NA)
result.test.1

##
## 5-sample test for equality of proportions without continuity
## correction
##
## data: d.noT.O_sum$numb out of d.noT.O_sum$count.no.NA
## X-squared = 20, df = 4, p-value = 0.002
## alternative hypothesis: two.sided
## sample estimates:
## prop 1 prop 2 prop 3 prop 4 prop 5
## 0.614 0.469 0.365 0.612 0.328

result.test.2 <- BayesianFirstAid::bayes.prop.test(d.noT.O_sum$numb,
                                                    d.noT.O_sum$count.no.NA)
result.test.2

##
## Bayesian First Aid proportion test
##
## data: d.noT.O_sum$numb out of d.noT.O_sum$count.no.NA
## number of successes: 43, 30, 19, 30, 20
## number of trials: 70, 64, 52, 49, 61
## Estimated relative frequency of success [95% credible interval]:
## Group 1: 0.61 [0.50, 0.72]
## Group 2: 0.47 [0.35, 0.59]
## Group 3: 0.37 [0.25, 0.50]
## Group 4: 0.61 [0.48, 0.74]
## Group 5: 0.33 [0.22, 0.45]
## Estimated pairwise group differences (row - column) with 95 % cred. intervals:
##
##          Group
##      2      3      4      5
## 1  0.14    0.24    0    0.28
##   [-0.024, 0.3] [0.082, 0.41] [-0.17, 0.18] [0.12, 0.44]
## 2          0.1    -0.14   0.14
##   [-0.075, 0.27] [-0.32, 0.036] [-0.029, 0.3]
## 3          -0.24   0.03
##   [-0.42, -0.057] [-0.13, 0.21]
## 4          0.28
##   [0.093, 0.44]

# print and plot bayes.prop.test results
plot(result.test.2)
```

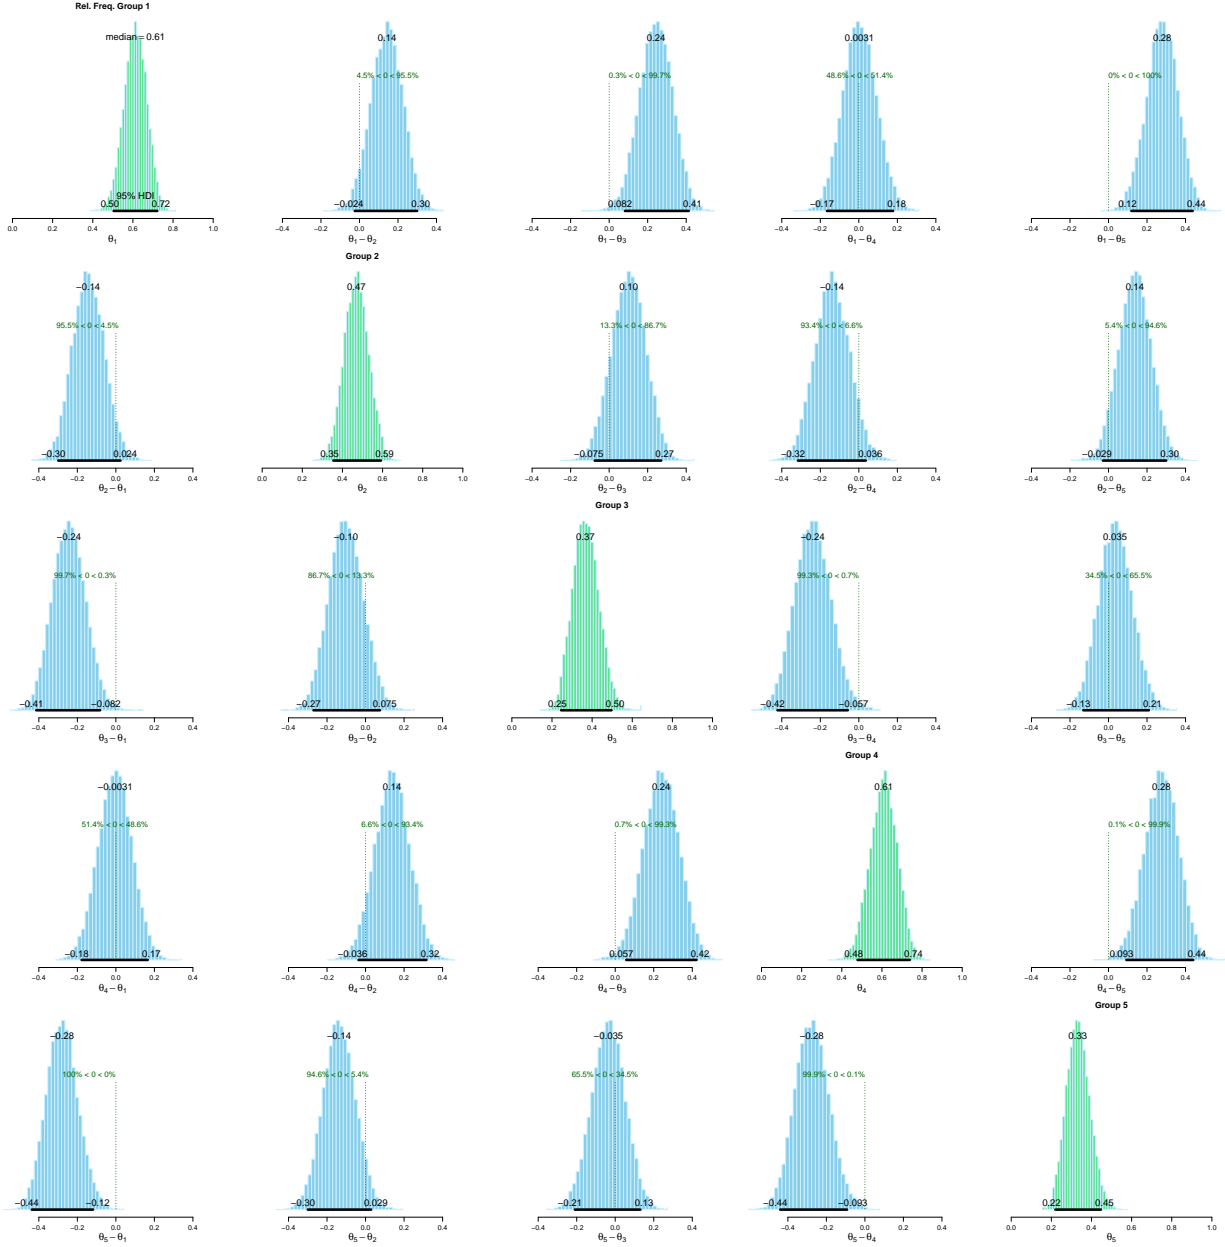

Note that:

Group 1 = Aramon

Group 2 = Cabernet-Sauvignon

Group 3 = Carignan

Group 4 = Chasselas

Group 5 = Grenache

### 5.3.3 Plot

Figure 3: Comparison of grapevine cultivar on the infection success in cuttings inoculated with *E. lata*.

```
# We need to retrieve the 95-percent-confidence interval and use them
# to set up the std error bars in the next plot
res <- as.data.frame(result.test.2$stats)
```

```

lim.down <- res[1:5,5]
lim.up <- res[1:5,6]

# Define the top and bottom of the errorbars
limits <- aes(ymax= lim.up *100,
              ymin= lim.down *100)

# set colors
my_col=c("grey30","grey50","grey70","grey30","grey90")

# barplot and std.error
p <- ggplot(d.noT.0_sum, aes(as.factor(reorder(var, perc)), perc, fill=var))
p <- p + geom_bar(stat="identity", position="dodge", color="black")
p <- p + geom_errorbar(limits, position=position_dodge(.9),width=.2)
p <- p + geom_text(aes(label=paste0(round(perc,0)," %\n(n= ",count.no.NA,")")),
                  position=position_dodge(width=0.9), vjust=-.5,
                  color=rep(c("black"),5))
p <- p + scale_fill_manual(values = my_col)
p <- p + ylim(0, 75)
p <- p + labs(x= "Grapevine varieties", y= "Inoculation efficiency (%)")
p <- p + theme_bw() + theme(legend.position="bottom")
print(p)

```

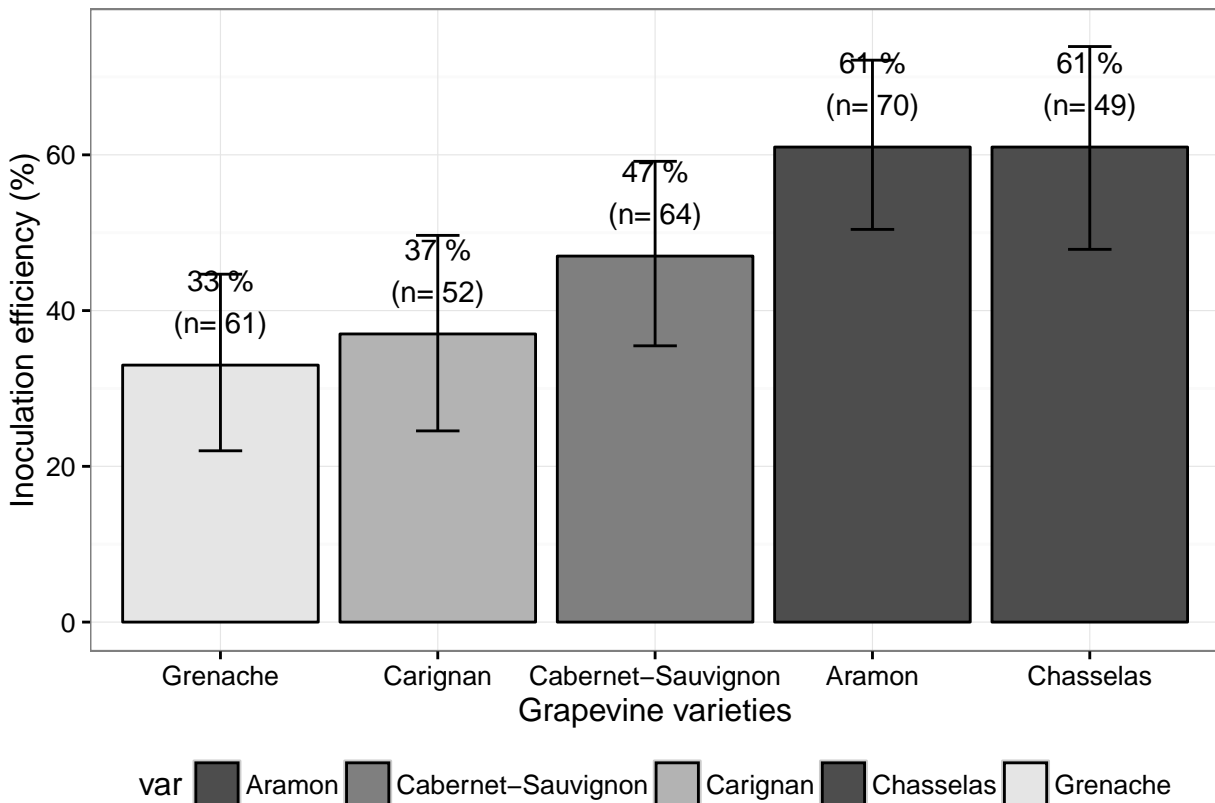

95% credible intervals were calculated for each cultivar using Bayesian proportion test and represented as error bars in the figure.

## 5.4 Figure 4

Effect of grapevine cultivar on the wood colonization in cuttings inoculated with *E. lata*.

```
# Replace contaminated sample by "NA" in the dataframe
data2$EL[data2$EL == "C"] <- NA # replace "C" by "NA"
data2$EL <- as.numeric(as.character(data2$EL)) # as numeric (0/1/NA)
data2$dpi <- as.factor(as.character(data2$dpi)) # as numeric (15/30/45/60)
data2$dist_cm <- as.factor(as.character(data2$dist_cm)) # as numeric (0/1/2)

# calculate the mean and the standard deviation and percentage (NA removed)
data2_sum <- data_summary(data= data2, varname= "EL",
                          groupnames=c("dpi","treat","var","dist_cm"))

# update column names
colnames(data2_sum)[5]<- "EL.mean"
colnames(data2_sum)[6]<- "EL.mean.sd"
colnames(data2_sum)[8]<- "EL.perc"

# select only inoculations
d <- subset(data2_sum, data2_sum$treat != "T-")
d <- subset(d, d$dist_cm != "0")
head(d)
```

| ##    | dpi | treat    | var                | dist_cm | EL.mean | EL.mean.sd | numb | EL.perc |
|-------|-----|----------|--------------------|---------|---------|------------|------|---------|
| ## 17 | 15  | VL_11-12 | Aramon             | 1       | 0.0000  | 0.00       | 0    | 0       |
| ## 18 | 15  | VL_11-12 | Aramon             | 2       | 0.0000  | 0.00       | 0    | 0       |
| ## 20 | 15  | VL_11-12 | Cabernet-Sauvignon | 1       | 0.0000  | 0.00       | 0    | 0       |
| ## 21 | 15  | VL_11-12 | Cabernet-Sauvignon | 2       | 0.0000  | 0.00       | 0    | 0       |
| ## 23 | 15  | VL_11-12 | Carignan           | 1       | 0.0625  | 0.25       | 1    | 6       |
| ## 24 | 15  | VL_11-12 | Carignan           | 2       | 0.0000  | 0.00       | 0    | 0       |

```
## count.no.NA
## 17 20
## 18 20
## 20 18
## 21 19
## 23 16
## 24 16

### FUNCTION to plot colonization of wood per variety

ggplot.wood.coloniz.per.dist <- function(d, distance){

  dtemp <-subset(d, d$dist_cm==distance)

  # ggplot
  p <- ggplot(dtemp, aes(x=dpi, y=EL.perc, group=var))
  p <- p + geom_line(aes(linetype=var, color=var, size=var))
  p <- p + geom_point(aes(shape=var), size=3)
  p <- p + scale_linetype_manual(values=c("solid","dashed","dashed","solid","solid"))
  p <- p + scale_color_manual(values= c("red","violet","green","brown","blue"))
  p <- p + scale_size_manual(values=c(1,1,1,1,1))
  p <- p + scale_shape_manual(values=c(17,3,15,19,19))
  p <- p + labs(title = paste0("at ",distance, " cm from IP"))
  p <- p + ylim(c(0, 100))
  p <- p + theme_bw() + theme(legend.position="bottom")
}
```

```
print(p)
}

p1 <- ggplot.wood.coloniz.per.dist(d, distance=1)
```

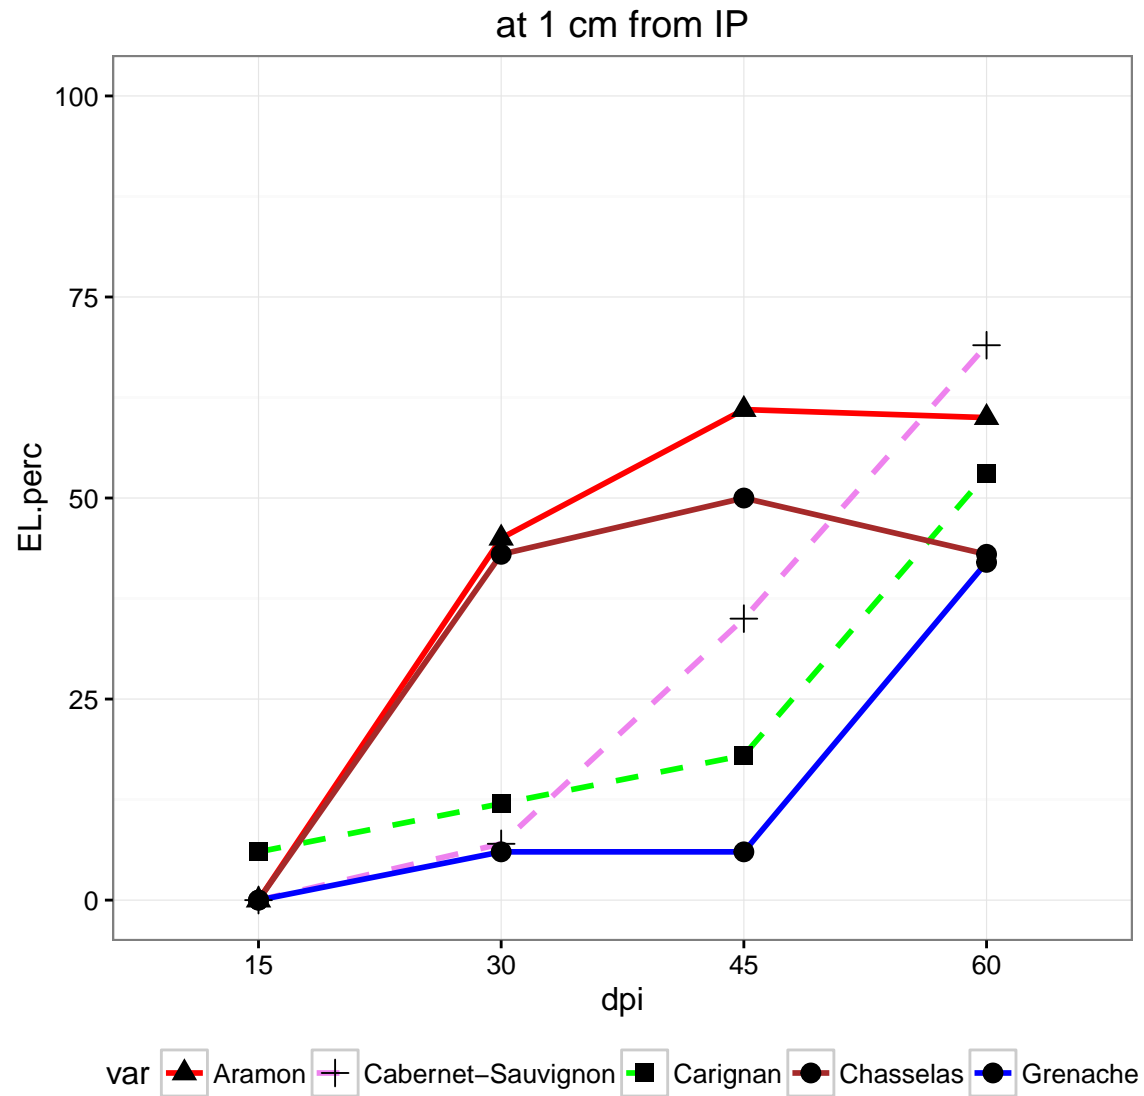

```
p2 <- ggplot.wood.coloniz.per.dist(d, distance=2)
```

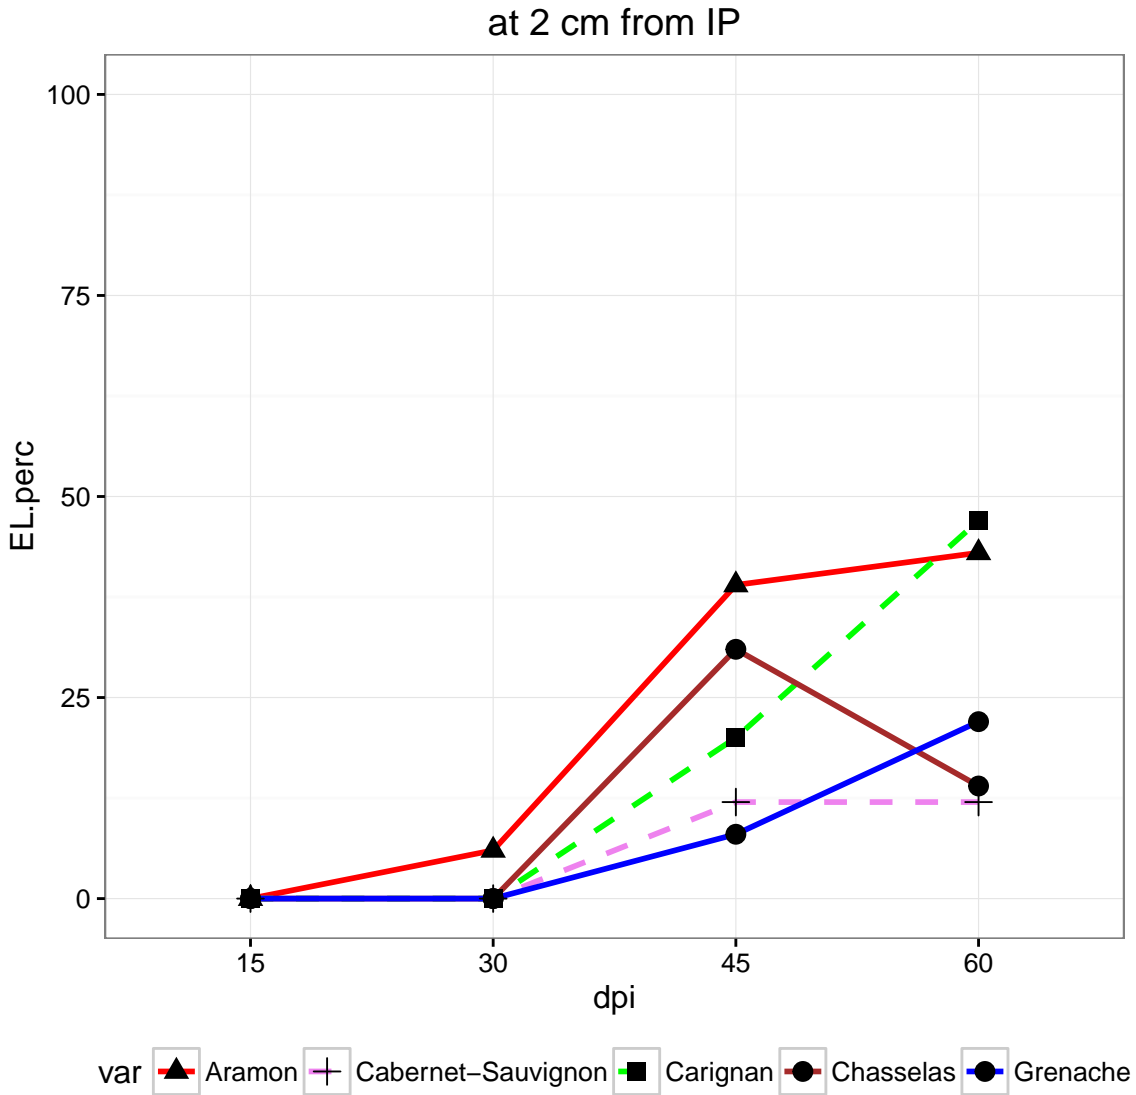

## 6 Experiment 3

qPCR as a tool to evaluate wood colonization by *E. lata*.

### 6.1 Figure 5

Plot raw data

```
# Function to calculate the standard error from dataframe x
std.error <- function(x, na.rm = T) {
  sqrt(var(x, na.rm = na.rm)/length(x[complete.cases(x)]))
}

# calculate means and std.error
dpi.mean <- ddply(dpi.df, .(treat, PCR, dist_cm, dpi), summarise,
```

```

      "nb_copies.mean"= mean(nb_copies, 2, na.rm = TRUE),
      "nb_copies.std" = std.error(nb_copies, na.rm = TRUE),
      count.no.NA = length(na.omit(nb_copies)))

str(dpi.mean)

## 'data.frame':  34 obs. of  7 variables:
## $ treat      : Factor w/ 3 levels "EL","H2O","T-": 1 1 1 1 1 1 1 1 1 1 ...
## $ PCR        : Factor w/ 2 levels "actin","EL": 1 1 1 1 1 1 1 1 2 2 ...
## $ dist_cm    : Factor w/ 2 levels "1-","1+": 1 1 1 1 2 2 2 2 1 1 ...
## $ dpi        : int  15 30 45 60 15 30 45 60 15 30 ...
## $ nb_copies.mean: num  18648 33384 34430 34367 14092 ...
## $ nb_copies.std : num   6937 1114 1684 2015 775 ...
## $ count.no.NA   : int    3 4 4 4 3 2 2 3 3 4 ...

head(dpi.mean)

##   treat  PCR dist_cm dpi nb_copies.mean nb_copies.std count.no.NA
## 1   EL actin    1-  15         18648          6937           3
## 2   EL actin    1-  30         33384          1114           4
## 3   EL actin    1-  45         34430          1684           4
## 4   EL actin    1-  60         34367          2015           4
## 5   EL actin    1+  15         14092           775           3
## 6   EL actin    1+  30         17515           925           2

# remove actin PCR
tmp <- subset(dpi.mean, PCR!="PAL" & PCR!="PCH" &
              treat!="H2O" & treat!="PAL" & treat!="PCH")
levels(tmp$treat)[5]<- "CONTROLS"
levels(tmp$treat)[1]<- "EL inoc"
levels(tmp$PCR)[1] <- "Actin V.vinifera"
levels(tmp$PCR)[2] <- "Beta-tubulin E.lata"
levels(tmp$dist_cm) <- c("-1 cm below IP", "+1 cm above IP")

# colors
my_col=c("grey","pink")

# Define the top and bottom of the errorbars
limits <- aes(ymax= nb_copies.mean + nb_copies.std,
              ymin= nb_copies.mean - nb_copies.std)

# barplot and std.error
p <- ggplot(tmp, aes(as.factor(dpi), nb_copies.mean, fill=PCR))
#p <- p + ylim(0,40000)
p <- p + geom_bar(stat="identity", position="dodge", color="black")
p <- p + geom_errorbar(limits, position=position_dodge(.9),width=.2)
p <- p + geom_text(aes(label=paste0(round(nb_copies.mean,0),"\\n(n=",count.no.NA,")")),
                  position=position_dodge(width=0.9), vjust=-.1)
p <- p + scale_fill_manual(values = my_col)
p <- p + labs(title= "", x= "Number of days after inoculation",
              y= "Gene copy number (mean), by qPCR")
p <- p + facet_grid(PCR ~ dist_cm*treat, scales = "free_y")
p <- p + theme_bw() + theme(legend.position="top")
print(p)

```



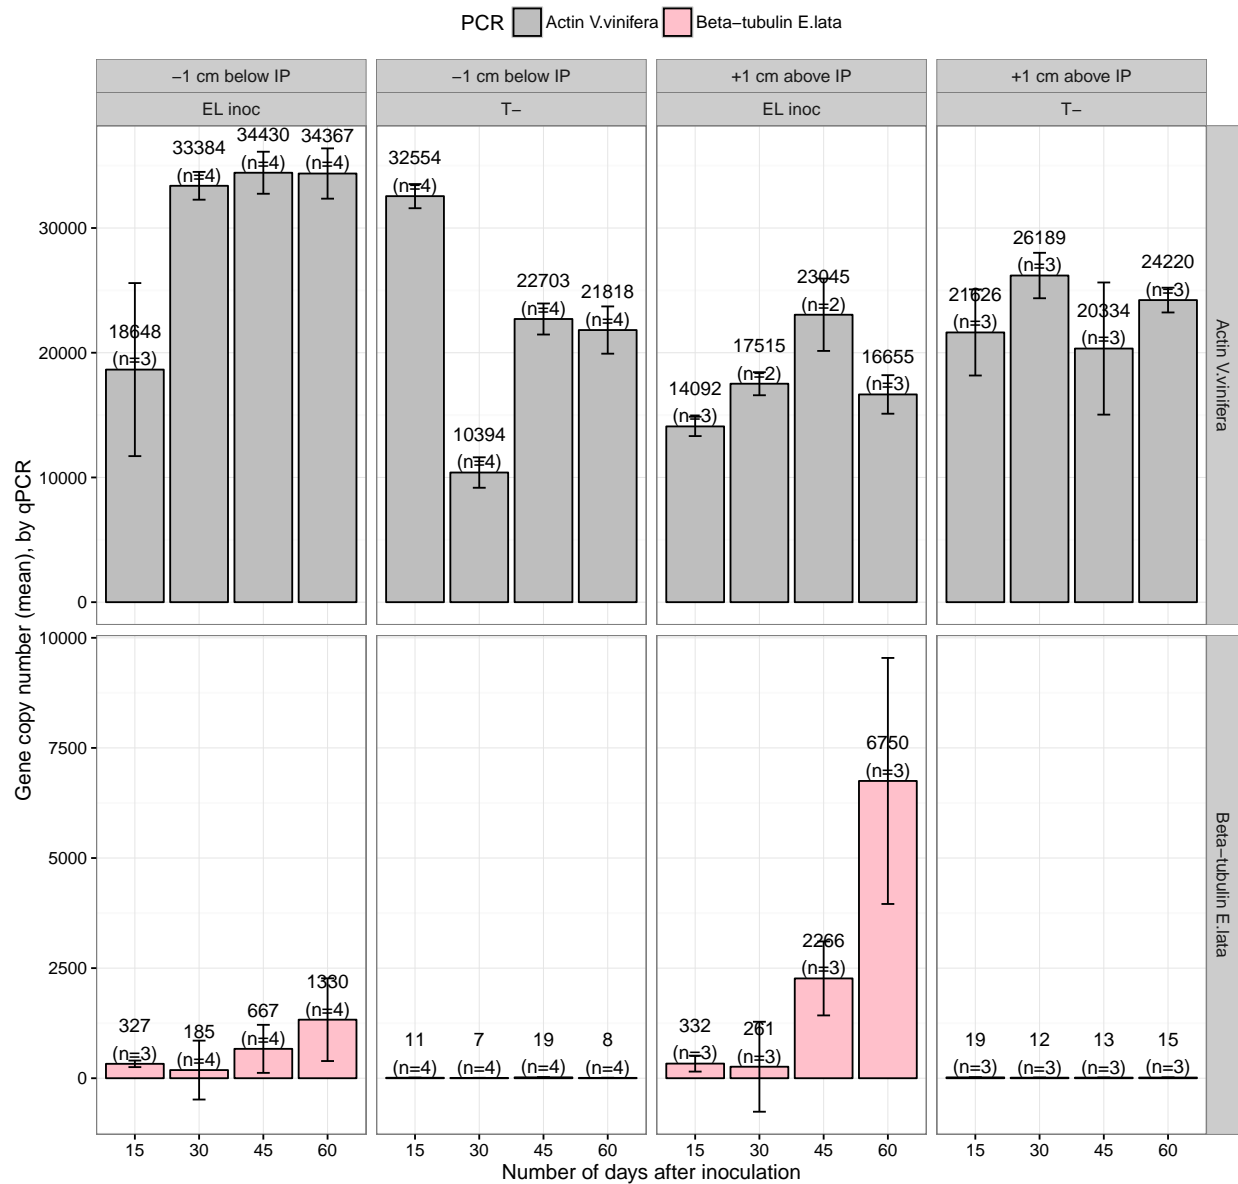

## 6.2 Figure S4

Wood colonization by *E. lata* monitored by qRT-PCR: ratio -tubulin / actin.

```
# format data before ratio
d <- dpi.df[,c("sample", "treat", "PCR", "dist_cm", "dpi", "nb_copies")]
d$dpi <- factor(d$dpi)
```

```
# aggregate
d2 <- cast(d, sample+treat+dist_cm+dpi ~ PCR, median)
```

## Using nb\_copies as value column. Use the value argument to cast to override this choice

```

# calculate ratio
d2$ratio <- d2$EL / d2$actin

# calculate RATIO means and std.error
d2.mean <- ddply(d2, .(treat, dist_cm, dpi), summarise,
  "ratio.mean"= mean(ratio, 2, na.rm = TRUE),
  "ratio.std" = std.error(ratio, na.rm = TRUE),
  "count" = length(na.omit(ratio)))

# Define the top and bottom of the errorbars
limits <- aes(ymax= ratio.mean + ratio.std,
  ymin= ratio.mean - ratio.std)

# barplot
p <- ggplot(na.omit(d2.mean), aes(as.factor(dpi), ratio.mean, fill=treat))
p <- p + geom_bar(stat="identity", position="dodge", color="black")
p <- p + ylim(0,0.75)
p <- p + geom_errorbar(limits, position=position_dodge(.9),width=.2)
p <- p + geom_text(aes(label=paste0(round(ratio.mean,2),"\n(n=",count,")")),
  position=position_dodge(width=0.9), vjust=-.1)
p <- p + scale_fill_manual(values = rep("lightblue",3))
p <- p + labs(title= "", x= "Number of days after inoculation",
  y= "Ratio b-tubulin/actin")
p <- p + facet_grid(. ~ dist_cm*treat, scales = "free_y")
p <- p + theme_bw() + theme(legend.position="none")
print(p)

```

```
## Warning: Removed 1 rows containing missing values (geom_errorbar).
```

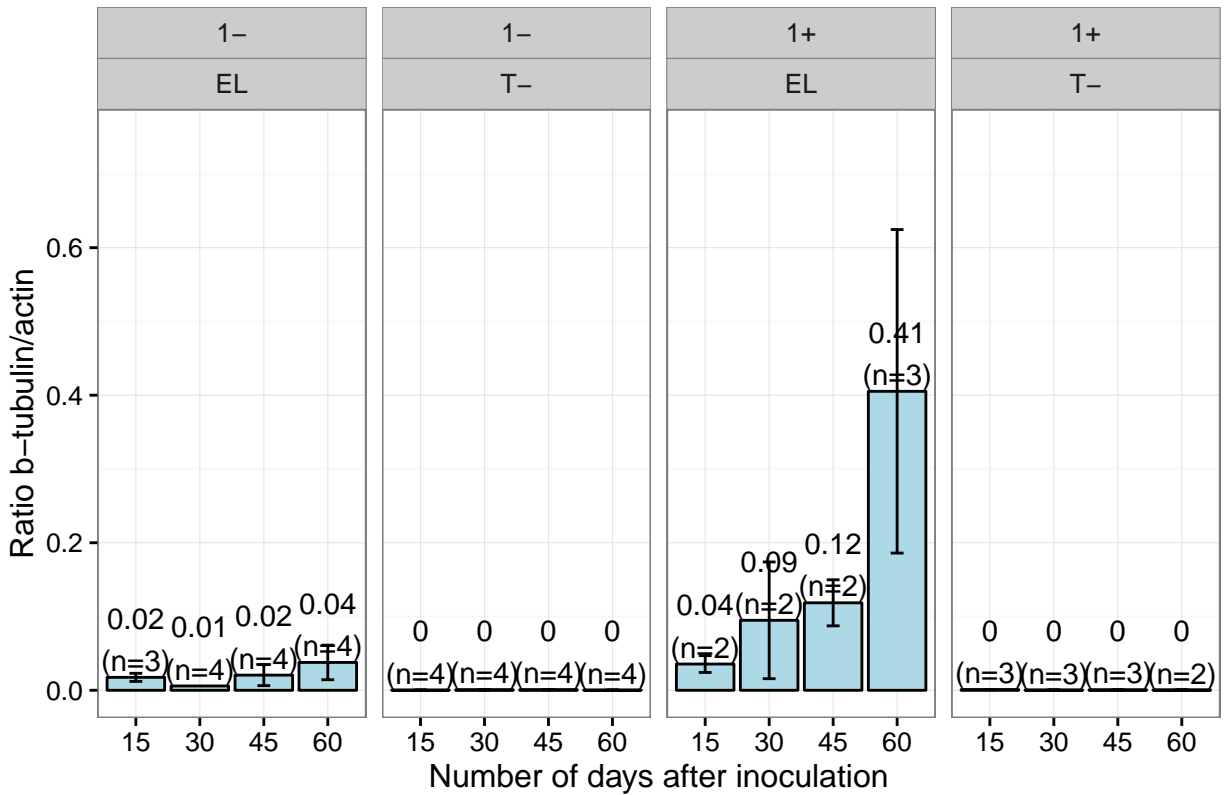

## 6.3 Analysis (figure 5)

### 6.3.1 Set up dataframe

```
# select data
d <- dpi.df[,c("sample", "treat", "PCR", "dist_cm", "dpi", "nb_copies")]
d <- subset(d, treat!="T-" & treat!="H2O" & PCR!="actin")
d <- droplevels(d)

# Convert variables to factor
d <- within(d, {sample <- factor(sample)
  treat <- factor(treat)
  PCR <- factor(PCR)
  dist_cm <- factor(dist_cm)
  dpi <- factor(dpi)
})

str(d)

## 'data.frame': 32 obs. of 6 variables:
## $ sample : Factor w/ 32 levels "EL_2sem_1cm-1",...: 1 2 3 4 9 10 11 12 17 18 ...
## $ treat : Factor w/ 1 level "EL": 1 1 1 1 1 1 1 1 1 1 ...
## $ PCR : Factor w/ 1 level "EL": 1 1 1 1 1 1 1 1 1 1 ...
## $ dist_cm : Factor w/ 2 levels "1-", "1+": 1 1 1 1 1 1 1 1 1 1 ...
## $ dpi : Factor w/ 4 levels "15", "30", "45",...: 1 1 1 1 2 2 2 2 3 3 ...
## $ nb_copies: num 327 NA 505 255 141 ...
```

### 6.3.2 Explore data (interaction plot)

```
# interaction plot for vizualization
with(na.omit(d), interaction.plot(dpi, dist_cm, nb_copies,
                                  lty= c(1, 12), lwd = 3,
                                  xlab = "Days post-inoculation",
                                  ylab = "B-tubulin copy number",
                                  trace.label = "group"))
```

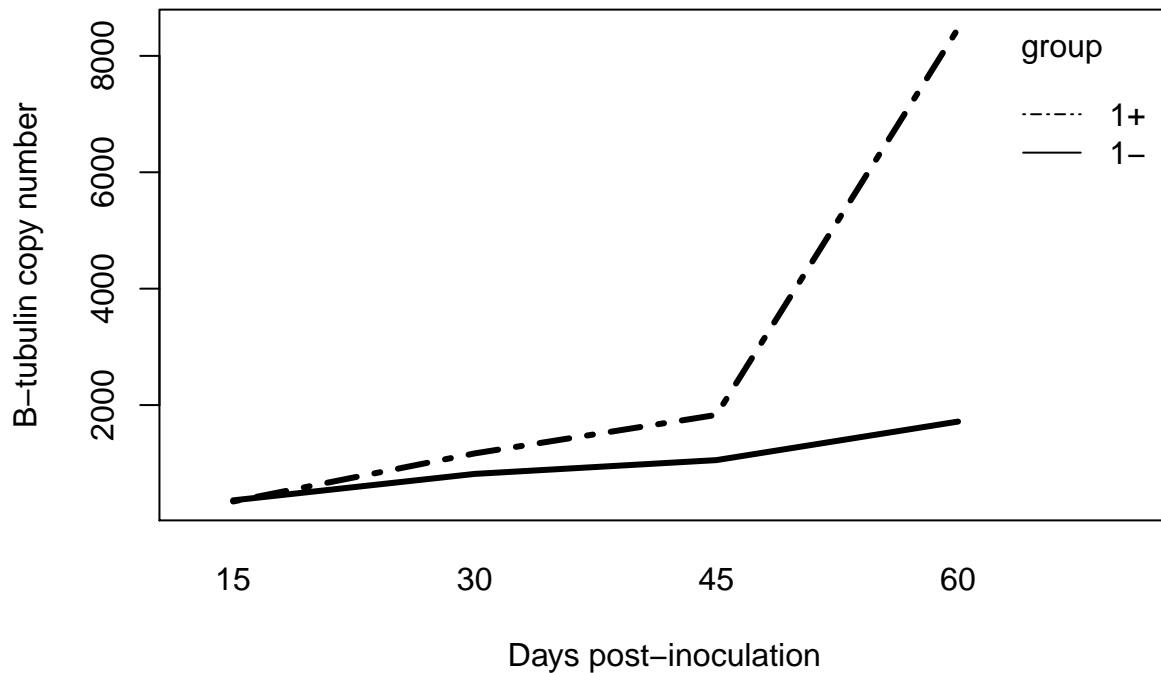

### 6.3.3 Linear model fit

Fit linear model (with repeated measures)

```
# estimate parameters of model
reg.aov <- lm(nb_copies ~ dist_cm * dpi, data= d, na.action = na.exclude)
```

### 6.3.4 Diagnostics via residuals

```
# add standardized residuals (divided by sigma) to df
d$res.std <- residuals(reg.aov) / summary(reg.aov)$sigma

# add fitted data to df
d$fit.dat <- fitted(reg.aov)
```

```
# plot diagnostics
par(mfrow=c(1,2))
# Plot standardized residuals versus fitted data
plot(d$fit.dat, d$res.std,
     ylim=c(-5,5), main="Standardized residuals vs fitted data",
     xlab="Fitted data", ylab="Standardized residuals");
abline(h=c(-2,0,2), lty=c(3,2,3), col=c("red", "black", "red"))

# qqplot
#qqnorm(d$res.std); abline(a=0, b=1, col="red")
qqPlot(d$res.std)
```

## Standardized residuals vs fitted data

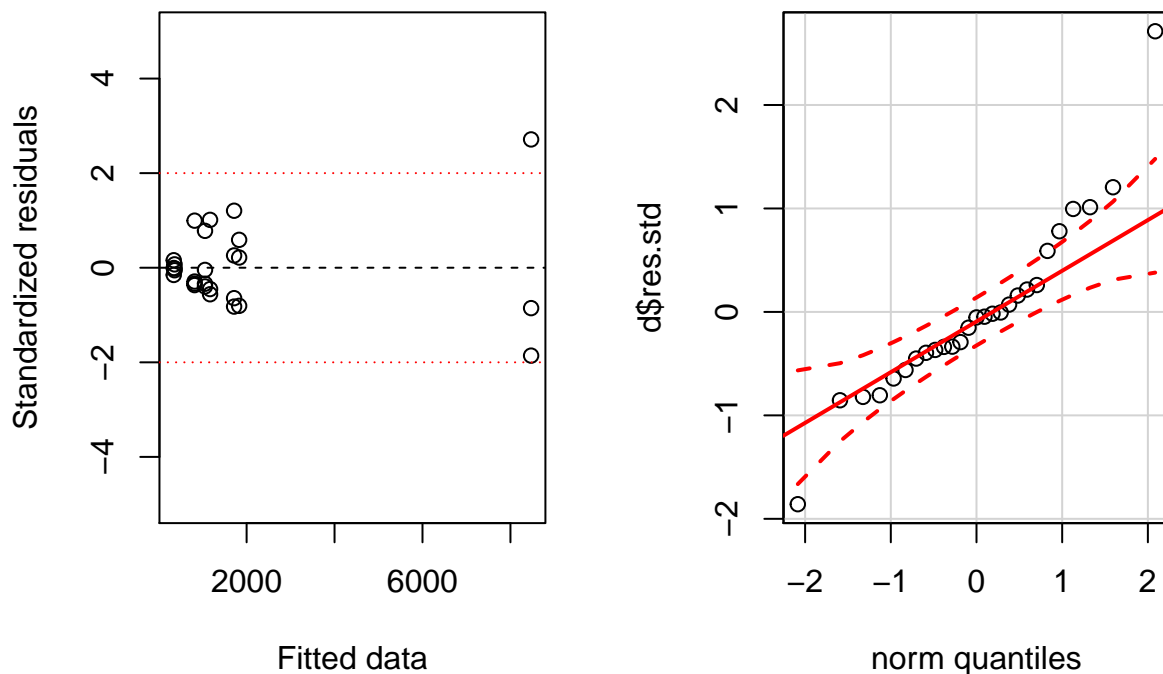

```
par(mfrow=c(1,1))

# other diagnostics
# plot(reg.aov)
```

In theory, 95% of residuals should roughly be in the interval  $[-2, 2]$ . Here we observed one outlier, but all other residuals are roughly in the 95% interval. We therefore decided to carry on with the analysis of variance.

### 6.3.5 Anova

Analysis of variance for inoculated samples collected at 1 cm from IP (above and below).

```
# analysis of variance
summary(reg.aov)
```

```
##
## Call:
## lm(formula = nb_copies ~ dist_cm * dpi, data = d, na.action = na.exclude)
##
## Residuals:
##      Min       1Q   Median       3Q      Max
## -3743    -852    -107     479    5463
##
## Coefficients:
##              Estimate Std. Error t value Pr(>|t|)
## (Intercept)         362        1163   0.31  0.7587
## dist_cm1+          -19         1644  -0.01  0.9909
## dpi30              455         1538   0.30  0.7707
## dpi45              692         1538   0.45  0.6580
## dpi60             1354         1538   0.88  0.3898
## dist_cm1+:dpi30     371         2252   0.16  0.8707
## dist_cm1+:dpi45     796         2252   0.35  0.7277
## dist_cm1+:dpi60    6773         2252   3.01  0.0072 **
## ---
## Signif. codes:  0 '***' 0.001 '**' 0.01 '*' 0.05 '.' 0.1 ' ' 1
##
## Residual standard error: 2010 on 19 degrees of freedom
## (5 observations deleted due to missingness)
## Multiple R-squared:  0.665, Adjusted R-squared:  0.542
## F-statistic:  5.4 on 7 and 19 DF, p-value: 0.00158
```

```
anova(reg.aov)
```

```
## Analysis of Variance Table
##
## Response: nb_copies
##           Df    Sum Sq Mean Sq F value Pr(>F)
## dist_cm     1 24687059 24687059   6.09 0.0233 *
## dpi         3 76397979 25465993   6.28 0.0038 **
## dist_cm:dpi  3 52071749 17357250   4.28 0.0181 *
## Residuals   19 77049731 4055249
## ---
## Signif. codes:  0 '***' 0.001 '**' 0.01 '*' 0.05 '.' 0.1 ' ' 1
```

## 7 Experiment 4

Comparison of *E. lata* aggressiveness by qPCR.

### 7.1 Figure 6

Select and plot qPCR data

```
# select data
d <- d.agr

# Set margin
par(mar = c(7, 4, 5, 1))
```

```
# Boxplot tubulin vs treatment
boxplot(d$btub_Elata ~ d$Treatment,
        main=paste0("Comparison of E.lata isolates \nfor wood colonization"),
        ylab="Genome copy number", xlab="E. lata isolates",
        varwidth= TRUE, notch= FALSE, las= 2, col= c("brown", "green"))

# Add points
points(d$btub_Elata ~ d$Treatment, pch= 19)
```

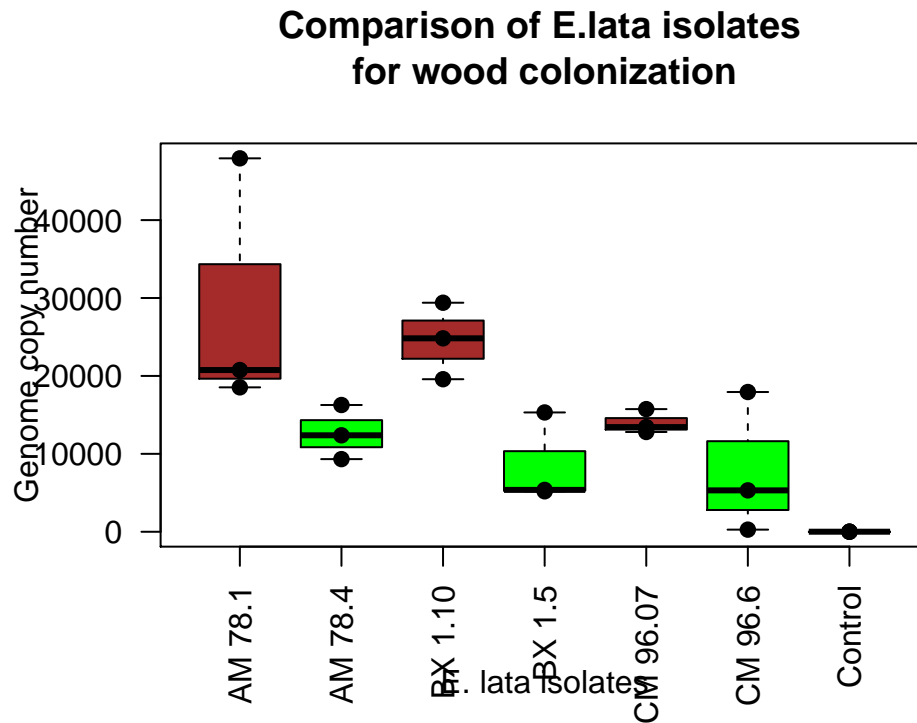

## 7.2 Analysis (figure 6)

### 7.2.1 Set up dataframe

```
# select data without controls
d <- droplevels(subset(d.agr, Treatment != "Control"))
d$sample <- factor(d$sample)
str(d)

## 'data.frame': 18 obs. of 7 variables:
## $ sample : Factor w/ 18 levels "1","2","3","4",...: 1 2 3 4 5 6 7 8 9 10 ...
## $ Treatment : Factor w/ 6 levels "AM 78.1","AM 78.4",...: 1 1 1 2 2 2 3 3 3 4 ...
## $ Rep : int 1 2 3 1 2 3 1 2 3 1 ...
## $ btub_Elata: num 18533 47926 20755 9323 12379 ...
## $ sd : num 605 727 1519 199 1498 ...
## $ agr_level : Factor w/ 2 levels "high-aggressive",...: 1 1 1 2 2 2 1 1 1 2 ...
```

```
## $ stroma      : Factor w/ 3 levels "AM","BX","CM": 1 1 1 1 1 1 2 2 2 2 ...
```

### 7.2.2 Explore data (interaction plot)

```
# interaction plot for visualization
with(na.omit(d), interaction.plot(agr_level, stroma, btub_Elata,
  lty= c(1, 9, 12), lwd = 3,
  xlab = "Aggressiveness",
  ylab = "B-tubulin copy number",
  trace.label = "group"))
```

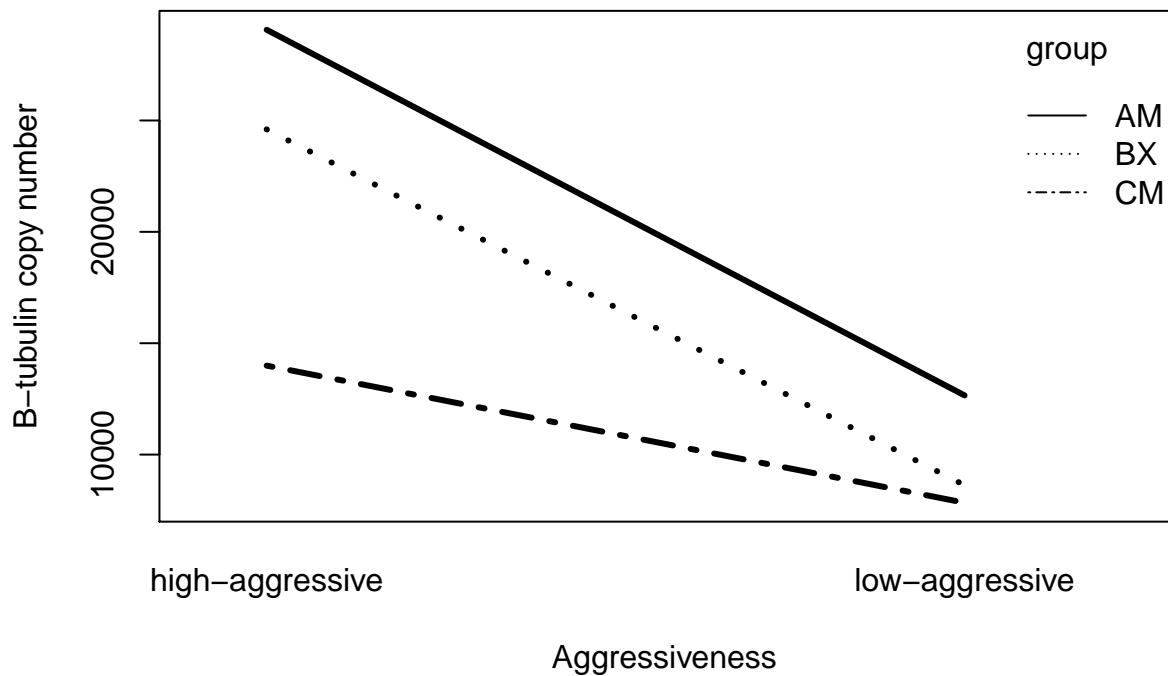

### 7.2.3 Linear model fit

Fit linear model

```
# estimate parameters of model
reg.aov <- lm(btub_Elata ~ stroma * agr_level, data= d)
```

### 7.2.4 Diagnostics via residuals

```
# add standardized residuals (divided by sigma) to df
d$res.std <- residuals(reg.aov) / summary(reg.aov)$sigma

# add fitted data to df
```



```

d$fit.dat <- fitted(reg.aov)

# plot diagnostics
par(mfrow=c(1,2))
# Plot standardized residuals versus fitted data
plot(d$fit.dat, d$res.std,
     ylim=c(-5,5), main="Standardized residuals vs fitted data",
     xlab="Fitted data", ylab="Standardized residuals");
abline(h=c(-2,0,2), lty=c(3,2,3), col=c("red", "black", "red"))

# qqplot
#qqnorm(d$res.std); abline(a=0, b=1, col="red")
qqPlot(d$res.std)

```

## Standardized residuals vs fitted data

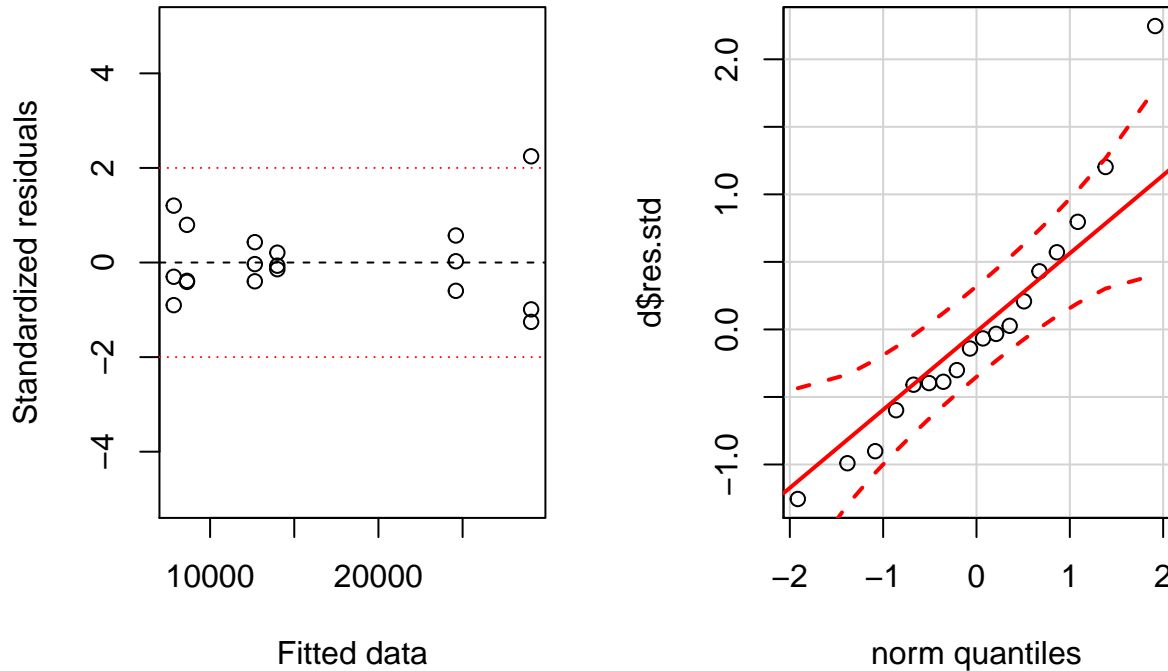

```
par(mfrow=c(1,1))
```

In theory, 95% of residuals should roughly be in the interval  $[-2,2]$ . Here we observed one outlier, but all other residuals are roughly in the 95% interval. We therefore decided to carry on with the analysis of variance.

### 7.2.5 Anova

Analysis of variance for inoculations performed with different isolates from three stroma origins.

```

# analysis of variance
summary(reg.aov)

```

```
##
```

```
## Call:
## lm(formula = btub_Elata ~ stroma * agr_level, data = d)
##
## Residuals:
##      Min       1Q   Median       3Q      Max
## -10538  -3410   -873    3145   18855
##
## Coefficients:
##              Estimate Std. Error t value Pr(>|t|)
## (Intercept)      29071      4847     6.00  6.2e-05 ***
## stromaBX         -4471      6854    -0.65   0.526
## stromaCM        -15077      6854    -2.20   0.048 *
## agr_levellow-aggressive -16415      6854    -2.39   0.034 *
## stromaBX:agr_levellow-aggressive    441      9693     0.05   0.964
## stromaCM:agr_levellow-aggressive   10260      9693     1.06   0.311
## ---
## Signif. codes:  0 '***' 0.001 '**' 0.01 '*' 0.05 '.' 0.1 ' ' 1
##
## Residual standard error: 8390 on 12 degrees of freedom
## Multiple R-squared:  0.575, Adjusted R-squared:  0.397
## F-statistic: 3.24 on 5 and 12 DF, p-value: 0.0441
```

```
anova(reg.aov)
```

```
## Analysis of Variance Table
##
## Response: btub_Elata
##              Df    Sum Sq Mean Sq F value Pr(>F)
## stroma         2 2.99e+08 1.49e+08   2.12  0.163
## agr_level       1 7.43e+08 7.43e+08  10.54  0.007 **
## stroma:agr_level 2 1.01e+08 5.05e+07   0.72  0.508
## Residuals      12 8.46e+08 7.05e+07
## ---
## Signif. codes:  0 '***' 0.001 '**' 0.01 '*' 0.05 '.' 0.1 ' ' 1
```
